# Supplementary material for: Time series analysis of total and direct associations between high temperatures and preterm births in Detroit, Michigan
Source: PubMed Central journal article supplement (PMC7045030; doi:10.1136/bmjopen-2019-032476), 2020-02-05
Supplement: bmjopen-2019-032476.draft_revisions.pdf [file bmjopen-2019-032476.draft_revisions.pdf]

# BMJ Open

BMJ Open is committed to open peer review. As part of this commitment we make the peer review history of every article we publish publicly available.

When an article is published we post the peer reviewers' comments and the authors' responses online. We also post the versions of the paper that were used during peer review. These are the versions that the peer review comments apply to.

The versions of the paper that follow are the versions that were submitted during the peer review process. They are not the versions of record or the final published versions. They should not be cited or distributed as the published version of this manuscript.

BMJ Open is an open access journal and the full, final, typeset and author-corrected version of record of the manuscript is available on our site with no access controls, subscription charges or pay-per-view fees (<http://bmjopen.bmj.com>).

If you have any questions on BMJ Open's open peer review process please email [info.bmjopen@bmj.com](mailto:info.bmjopen@bmj.com)

# BMJ Open

## Total and direct associations between high temperatures and preterm births in Detroit, Michigan

|                               |                                                                                                                                                                                                                                                                                                                                                                                                                                                                                                                                                                                                         |
|-------------------------------|---------------------------------------------------------------------------------------------------------------------------------------------------------------------------------------------------------------------------------------------------------------------------------------------------------------------------------------------------------------------------------------------------------------------------------------------------------------------------------------------------------------------------------------------------------------------------------------------------------|
| Journal:                      | <i>BMJ Open</i>                                                                                                                                                                                                                                                                                                                                                                                                                                                                                                                                                                                         |
| Manuscript ID                 | bmjopen-2019-032476                                                                                                                                                                                                                                                                                                                                                                                                                                                                                                                                                                                     |
| Article Type:                 | Research                                                                                                                                                                                                                                                                                                                                                                                                                                                                                                                                                                                                |
| Date Submitted by the Author: | 20-Jun-2019                                                                                                                                                                                                                                                                                                                                                                                                                                                                                                                                                                                             |
| Complete List of Authors:     | Gronlund, Carina; University of Michigan Institute for Social Research, Survey Research Center<br>Yang, Alyssa; Urban Indian Health Institute<br>Conlon, Kathryn; University of California Davis<br>Bergmans, Rachel S.; University of Michigan Medical School,<br>Le, Hien; Chemours Co<br>Batterman, Stuart; University of Michigan, Environmental Health Sciences<br>Wahl, Robert; Michigan Department of Health and Human Services<br>Cameron, Lorraine; Michigan Department of Health and Human Services<br>O'Neill, Marie; University of Michigan, Environmental Health Sciences and Epidemiology |
| Keywords:                     | Maternal medicine < OBSTETRICS, STATISTICS & RESEARCH METHODS, EPIDEMIOLOGY                                                                                                                                                                                                                                                                                                                                                                                                                                                                                                                             |
|                               |                                                                                                                                                                                                                                                                                                                                                                                                                                                                                                                                                                                                         |

SCHOLARONE™  
Manuscripts

1  
2  
3 TITLE PAGE  
45 **Title**  
67 Total and direct associations between high temperatures and preterm births in Detroit, Michigan  
89 **Authors**  
1011 Carina J. Gronlund<sup>1</sup>, Alyssa J. Yang<sup>2</sup>, Kathryn C. Conlon<sup>3</sup>, Rachel S. Bergmans<sup>4</sup>, Hien Q. Le<sup>5</sup>,  
12 Stuart A. Batterman<sup>6</sup>, Robert L. Wahl<sup>7</sup>, Lorraine Cameron<sup>7</sup>, Marie S. O'Neill<sup>6,8</sup>  
1314  
15 <sup>1</sup>University of Michigan Institute for Social Research  
16 Survey Research Center, Social Environment and Health Program  
17 426 Thompson St. Rm 3340  
18 Ann Arbor, MI 48104  
19 [gronlund@umich.edu](mailto:gronlund@umich.edu)  
20 734-615-9215  
2122  
23 <sup>2</sup>Urban Indian Health Institute, Seattle, WA, USA  
2425 <sup>3</sup>University of California at Davis, Sacramento, CA, USA  
2627 <sup>4</sup>Department of Psychiatry, University of Michigan, Ann Arbor, MI, USA  
2829 <sup>5</sup>Health Services/Epidemiology, The Chemours Company, Wilmington, DE, USA  
3031 <sup>6</sup>Department of Environmental Health Sciences, University of Michigan, Ann Arbor, MI, USA  
32  
3334 <sup>7</sup>Michigan Department of Health and Human Services, Lansing, MI, USA  
3536 <sup>8</sup>Department of Epidemiology, University of Michigan, Ann Arbor, MI, USA  
37  
3839 Word count: 2,984  
40  
41  
42  
43  
44  
45  
46  
47  
48  
49  
50  
51  
52  
53  
54  
55  
56  
57  
58  
59  
60

## ABSTRACT

Background: Preterm births (PTBs) cause significant infant health risks, and several studies have found associations between high outdoor temperatures and PTB. We estimated both the total and natural direct effects (independent of particulate matter, ozone and nitrogen dioxide) of the prior two-day mean apparent temperature (AT) on PTB in the Detroit, Michigan area for the warm months (May to September), 1991-2001. We evaluated effect modification by maternal age, race, education, smoking status, and prenatal care.

Methods: We used a time series Poisson regression with splines of AT, wind speed, solar radiation, and citywide average precipitation to estimate total effects. To accommodate multiple mediators and exposure-mediator interactions, AT inverse odds weights, predicted by meteorological and air pollutant covariates, were added in a subsequent model to estimate direct effects.

Results: At 24.9 °C relative to 18.6 °C, 10.6% (95% Confidence Interval: 3.8%, 17.2%) of PTBs were attributable to the total effects of AT, and 10.4% (95% CI: 2.2%, 17.5%) to direct effects.

Relative excess risks of interaction indicated that the risk of PTB with increasing temperature above 18.6 °C was significantly lower among black mothers and higher among mothers less than 19, older than 30, with late or no prenatal care, and who smoked.

Conclusion: This additional evidence of a direct association between high temperature and PTB may motivate public health interventions to reduce extreme heat exposures among pregnant women, particularly among those who may have enhanced vulnerability.

## STRENGTHS AND LIMITATIONS OF THIS STUDY

- We expand on a growing literature demonstrating total effects of temperature on PTB by examining mediation of the total temperature effect by air pollutants.
- We did not have geographic identifiers for the study participants at a level as fine as residential address or indoor exposure information, and we therefore assigned time-varying environmental exposures at an outdoor, citywide level. However, a low prevalence of residential air conditioning (32%) in the study time period suggests that outdoor exposures may have more accurately reflected indoor exposures than in more recent studies.
- We account for multiple mediators and potential exposure-mediator interactions by applying a straightforward technique—the use of inverse odds weights—to separate the total effects of temperature on PTB from the direct effects.
- We used methods examining potential synergistic effects, as opposed to just examining statistical interactions, by other characteristics that confer vulnerability to PTB.

## INTRODUCTION

Preterm births (PTBs) are defined as births that occur before 37 gestational weeks. Babies born prematurely are at greater risk of infant death and impaired health, such as cerebral palsy and impairments of cognitive development, hearing, vision, respiration, and digestion. In 2016, 10% of babies were born prematurely, with statewide rates ranging 7.8-13.7%<sup>1</sup>. Within-state disparities in preterm birth rates can be even greater: from 1990-2010, 18% of births in Detroit, Michigan were preterm births<sup>2</sup>.

Certain risk factors are known to be associated with PTB, such as cigarette smoking, alcohol use, hypertension, and diabetes<sup>1</sup>. Air pollution is associated with PTB<sup>3,4</sup>, and higher ambient temperature has been proposed as a risk factor for PTB<sup>5,6</sup>.

High ambient temperature could pose a risk for PTB through several biological pathways. Higher temperatures may increase stress levels<sup>7</sup>. Stress increases the levels of cortisol and epinephrine, potentially leading to the secretion of placental corticotropin-releasing hormones (CRH). Placental CRH can then activate the fetal hypothalamic-pituitary-adrenal (HPA) axis, which could prompt the fetal expression of cortisol and dehydroepiandrosterone-sulfate (DHEA-S) and placental release of estriol and prostaglandins, potentially triggering PTB<sup>8</sup>. Dehydration due to high temperatures and sweating could also reduce blood flow to the uterus and induce a greater release of antidiuretic hormone and oxytocin, which could trigger labor onset<sup>9</sup>.

Several studies have evaluated possible associations between high ambient temperature and PTB, with mixed results<sup>5,6</sup>. Studies in cities in Australia, Quebec, China, Belgium, Italy, Spain and across the U.S. have all found significant positive associations between hot temperatures within the week preceding delivery and PTB<sup>5,6,10-18</sup>.

However, earlier, rigorously conducted time series analyses of temperature and PTB in Germany and in London, England did not find associations<sup>19,20</sup>. Likewise, in Chicago, Illinois,

Porter et al. found no effect of the July 1995 heat wave on gestational length<sup>21</sup>. Sources of heterogeneity among these effect estimates may include differences in study design, prevailing climate and regional adaptation, population structure, exposure assessment, critical windows of exposure considered, and methods of gestational age assessment<sup>14</sup>. Additionally, studies often control for air pollution exposure, although the argument has been made that treating air pollutants as confounders of temperature-health associations is inappropriate given that high temperatures can contribute to increased air pollutant concentrations, and both temperature and air pollution are affected by sunlight<sup>22</sup>. These differences in the manner in which air pollutants are accounted for in the temperature-PTB modeling may also account for the heterogeneity observed in this literature.

We investigated the association between high AT and PTB in the Detroit, Michigan area, estimating both the total effects of temperature as well as the natural direct effects, excluding potential mediation effects by the air pollutants ozone, particulate matter with an aerodynamic diameter of less than 10 micrometers (PM<sub>10</sub>), and nitrogen dioxide (NO<sub>2</sub>). We further examined whether the maternal risk factors of age, race, education, smoking, and level of prenatal care modified the association between high AT and PTB.

## METHODS

### **Outcome Variable**

Birth outcome data were derived from birth certificate records kept by the Michigan Department of Health and Human Services<sup>4</sup>. This sample population included live, singleton births that occurred from January 1, 1991 to December 31, 2001 in ZIP codes within 4 km of one of three air quality monitors (the Allen Park, Linwood, and East 7 Mile monitors) in and bordering Detroit, Michigan<sup>4</sup>. These births were further restricted to only PTBs, defined as births that were less than 37 gestational weeks, and births that only occurred May-September, in order

1  
2  
3 to focus on heat exposures. Birth certificate data also included date of birth and maternal age,  
4  
5 race, smoking status, education level, and level of prenatal care.  
6

### 7 **Identification of Confounders and Mediators**

8  
9  
10 A directed acyclic graph (DAG) was constructed to define the causal framework and  
11  
12 elucidate potential mediating effects of air pollutants in the association between AT and PTB  
13  
14 (Figure 1). Primary and secondary air pollutants can be considered mediators of the temperature-  
15  
16 PTB association given that: 1) they have been associated with the health outcome<sup>3</sup>, 2) high  
17  
18 temperature enhances the rate of ground-level ozone formation, and 3) power plant emissions  
19  
20 increase when temperatures rise to accommodate additional demand for air conditioning<sup>23</sup>.  
21  
22 Furthermore, the weather system is a causal parent to both AT and the pollutants given that  
23  
24 meteorological conditions such as wind speed, precipitation, and cloud cover affect pollutant  
25  
26 formation and exposure as well as sunlight, which increases AT and promotes ozone formation<sup>24</sup>.  
27  
28  
29

### 30 **Exposure Variables**

31  
32  
33 Daily mean temperature, dew point temperature, and wind speed were obtained from the  
34  
35 National Center for Environmental Information<sup>25</sup>. Data from the Detroit City Airport was used  
36  
37 due to its proximity to the mothers' ZIP codes of residence. AT was calculated using the  
38  
39 following formula:  $[-2.653 + (0.994 * \text{Temperature in } ^\circ\text{C}) + 0.0153 * (\text{Dew Point Temperature}$   
40  
41  $\text{in } ^\circ\text{C})^2]$ <sup>26</sup>. From Detroit City Airport, 11% and 15% of temperatures and dew points were  
42  
43 missing, respectively, so data from Detroit Metropolitan Airport were used to replace these  
44  
45 missing data. Among the non-missing values, daily AT from Detroit City Airport was highly  
46  
47 correlated with that from Detroit Metropolitan Airport (Pearson's correlation coefficient = 0.98).  
48  
49  
50

51  
52 The total amount of direct and diffuse solar radiation received on a horizontal surface  
53  
54 during each 60-minute period at the Detroit City Airport was retrieved from the National Solar  
55  
56 Radiation Database<sup>27</sup>. These data were modeled from meteorological data including cloud cover,  
57



1  
2  
3 aerosol, and ozone data from sources such as sun photometers and satellites and albedo data<sup>28</sup>.

4  
5 We further estimated daily means from the hourly solar radiation values.  
6

7  
8 Daily precipitation totals were obtained from Oregon State University's PRISM Climate  
9  
10 Group<sup>29</sup>. These are modeled at a 4-km resolution based on observations and a climatologically-  
11  
12 aided interpolation process. Rasters were cropped to the City of Detroit and daily citywide  
13  
14 averages were calculated.  
15

16  
17 Daily eight-hour maximum ozone and daily mean NO<sub>2</sub> and PM<sub>10</sub> concentrations were  
18  
19 obtained from the Environmental Protection Agency for all Wayne County, Michigan monitors  
20  
21 and averaged by day and pollutant<sup>30</sup>. Only daily monitor values for which 18 of the 24 hourly  
22  
23 values were available were retained, resulting in substantial missingness, which was addressed in  
24  
25 the statistical analysis below.  
26  
27

## 28 **Patient and Public Involvement**

29  
30 Patients were not involved.  
31

## 32 **Statistical Analysis**

33  
34 Case-crossover analysis is commonly used in studies of PTB and temperature<sup>14 15 31</sup>.  
35  
36 Because PTB is not a rare event in this particular population, the case-crossover odds ratios  
37  
38 would not approximate risk ratios. Therefore, we used a time series design with Poisson  
39  
40 regression, controlling for seasonal effects with a cubic b-spline for day-of-year, with 5, 2 or 8  
41  
42 knots, and a cubic b-spline for year with 2 knots. For AT and the covariates, non-linearity was  
43  
44 considered by initially modeling each as a b-spline with three knots and selecting a single knot  
45  
46 for subsequent modeling of the covariate as a piecewise linear spline when substantial  
47  
48 nonlinearity was visually evident. The 95% confidence intervals (CIs) were constructed from the  
49  
50 2.5<sup>th</sup> and 97.5<sup>th</sup> percentiles of 500 bootstrapped samples. In sensitivity analyses, given its wide  
51  
52  
53  
54  
55  
56  
57  
58  
59  
60

usage for this research question, a time-stratified case-crossover design was used with time-strata defined as two- or three-week periods.

To account for missing air pollutant values, we conducted multiple imputations using chained equations. We used a more general model including lag days 0-2 of the above meteorological and pollutant values, generating three imputations following two burn-ins. All subsequent analyses were conducted on each of the three resulting data sets.

To estimate the total effects of AT, we included terms for solar radiation, wind speed, and precipitation in the Poisson model, which blocked any of the paths in the DAG from AT to PTB that did not pass through the mediators (Figure 1). However, to estimate natural direct effects, we used a more generalizable technique—inverse odds weighting—given that we had multiple mediators and as well as potential exposure-mediator interactions<sup>32</sup>. In this technique, we first fit a standard linear regression of two-day mean AT (meanAT01) on the air pollutant mediators and covariates (solar radiation, wind speed, precipitation). We then estimated:

$$\text{inverse odds} = 1 / \exp(\text{predicted meanAT01} / \sigma^2) \quad \text{Equation 1}$$

where  $\sigma^2$  was the model mean squared-error. The inverse odds were then used as weights in the subsequent analysis of PTB and AT with the other covariates but not the air pollutants. The weights render AT independent of the mediators, thereby allowing the estimation of AT separately from the effects of the air pollutant mediators on PTB. Total and direct effects were calculated from each of the three imputed data sets and then each averaged.

To assess the public health impact of AT on PTB, we estimated the attributable fraction (AF), or the percent of PTB attributable to high AT among women exposed to the high AT. The AF was estimated as:  $1 / (1 - RR) * 100\%$  where the RR was for the 95<sup>th</sup> percentile (24.9 °C) relative to the 50<sup>th</sup> percentile (18.6 °C) of May-September two-day mean AT. Indirect effects

1  
2  
3 were estimated as the difference between the total effects and the direct effects. The 95%  
4 confidence intervals (CIs) were constructed from the 2.5<sup>th</sup> and 97.5<sup>th</sup> percentiles of 500  
5 bootstrapped samples.  
6  
7  
8

9  
10 To understand how the effects varied among maternal subgroups, we simultaneously  
11 included interaction terms between the AT spline and the indicator variables for black race, age  
12 16-19, age 30 years or older, low prenatal care (late or no prenatal care), current smoker, and no  
13 high school education. We expanded the data set such that we had rows for each unique  
14 combination of date and daily exposures, race, age group, education, prenatal care, and smoking  
15 status. Given the large number of zero counts, we specified a negative binomial distribution  
16 rather than a Poisson distribution. For public health significance, we were interested in the  
17 absolute rather than the relative increase in PTB risk due to synergistic effects between  
18 temperature and each modifier of interest. Therefore we focused on additive, rather than the  
19 multiplicative, interactions. Relative excess risk due to interaction (RERI)<sup>33</sup> was calculated for  
20 each potential modifier as:  
21  
22  
23  
24  
25  
26  
27  
28  
29  
30  
31  
32  
33  
34

$$RR_{AT=95th,EM=1} - RR_{AT=95th,EM=0} - RR_{AT=50th,EM=1} + 1 \quad \text{Equation 2}$$

35  
36 where EM was the effect modifier of interest and the denominator of each RR was the risk at the  
37 50<sup>th</sup> percentile of AT (18.6 °C) and the absence of the modifier (EM = 0). RERI confidence CIs  
38 were bootstrapped from 1,000 samples. All analyses were conducted in SAS 9.4 (Copyright  
39 2016, SAS Institute Inc., Cary, NC, USA) using PROC GLIMMIX, which allows for multiple  
40 splines in a Poisson regression.  
41  
42  
43  
44  
45  
46  
47  
48

## 49 RESULTS

50  
51 There were 9,053 singleton preterm births in this Detroit-area sample, May-September,  
52 1991-2001. Of these, 27.0% were among white mothers and 71.1% were among black mothers.  
53  
54  
55  
56  
57

1  
2  
3 A majority of the mothers were non-smokers (73.1%), had prenatal care (55.6%), were 20-29  
4 years of age (53.2%) and had at least a high school education (60.2%) (Table 1).  
5  
6

7  
8 On average, AT exposure was 18.0 °C, and among the days when AT was greater than  
9 the time-period-specific daily median of 18.6 °C (i.e., for the upper end of the temperature  
10 spline), AT averaged 1.5 °C higher. A total of 53% of the cases occurred on days with no rain, so  
11 the geometric mean precipitation was 0.4 mm. The mean ozone concentration was 44.8 ppb and  
12 the maximum was 102 ppb (Table 2). In examining the daily time series of ozone over the study  
13 period, the three-year running averages of the fourth highest daily 8-hour maximum value of  
14 ozone ranged from 77 to 92 ppb, suggesting that the (current) National Ambient Air Quality  
15 Standards (70 ppb) had been exceeded in each year of the study.  
16  
17  
18  
19  
20  
21  
22  
23  
24  
25

26  
27 To address potential sensitivity of the results to control for season, we varied the df in the  
28 day-of-year term, using 2, 5, and 8 df. The results were not highly sensitive to this choice, with  
29 the point estimates of the percentages of PTB attributable to AT ranging only from 8.1% (8 df) to  
30 9.9% (2 df) among pregnant women exposed to days when AT was 24.9 °C vs exposure on 18.6  
31 °C days (Table 3). In case-crossover analyses, the resulting odds ratios were also statistically  
32 significantly greater than 1.0, regardless of whether the time strata were two-week, three-week,  
33 or one-month periods. However, the odds ratios were greater in magnitude than the risk ratios  
34 estimated in the time series design, which is expected, given that odds ratios overestimate risk  
35 ratios when events are not rare.  
36  
37  
38  
39  
40  
41  
42  
43  
44  
45  
46

47  
48 The total effects were estimated as 10.6% (95% CI: 3.8%, 17.2%) of PTBs attributable to  
49 AT among pregnant women exposed to days when AT was 24.9 °C vs. exposure on 18.6 °C  
50 days. Accounting for mediation of this effect by PM<sub>10</sub>, ozone, and NO<sub>2</sub> by using inverse odds  
51 weights, the direct effect of AT on preterm birth was decreased to 10.4% (95% CI: 2.2%,  
52  
53  
54  
55  
56  
57

1  
2  
3 17.5%), although the difference between the two values was not statistically significant (indirect  
4  
5 effect = 0.3%, 95% CI: -1.7%, 2.6%).  
6

7  
8 In examining the RERI from interactions between AT and maternal characteristics, black  
9  
10 race was found to be protective, with an RERI significantly less than 0 (Table 4). The  
11  
12 magnitudes of RERIs are not meaningful, but this result indicates that the association between  
13  
14 high temperature and PTB is weaker among women of black race than non-black race. In  
15  
16 contrast, RERIs for age 16-19 years, age > 30 years, low prenatal care and tobacco smoking were  
17  
18 all significantly greater than 0, indicating that the association between PTB and high temperature  
19  
20 is stronger among women with these characteristics.  
21  
22

## 23 24 DISCUSSION

25  
26 The strong association between short-term temperature exposure and PTB in Detroit,  
27  
28 Michigan was consistent with several other studies' observed associations between PTB or  
29  
30 diminished gestational age and temperature exposures within the week prior to delivery at  
31  
32 regionally high temperatures. Regions in which these associations have been found include  
33  
34 Central Australia (8.3% at 40 °C daily maximum temperature)<sup>13</sup>, Northern California, USA  
35  
36 (11.6% increase for a 5.6 °C increase in weekly average AT in the warm season)<sup>31</sup>, Alabama,  
37  
38 USA (32.4% increase with two consecutive days of daily mean temperatures above the 98<sup>th</sup>  
39  
40 percentile)<sup>34</sup>, Barcelona, Spain (5-day reduction in average gestational age with heat index above  
41  
42 the 99<sup>th</sup> percentile)<sup>10</sup>, Rome, Italy (1.9% increase per 1 °C increase in maximum AT in the prior  
43  
44 two days and 19% increase during heat waves)<sup>35</sup>, Brisbane, Australia (13%-100% increase  
45  
46 during heat waves), in an aggregated sample of 12 U.S. cities (12-16% increase with 2.8 °C  
47  
48 increase in prior week)<sup>14</sup>, and Southern China (7% increase with previous-week temperatures  
49  
50 above 95<sup>th</sup> percentile)<sup>12</sup>.  
51  
52  
53  
54  
55  
56  
57

1  
2  
3 One strength of our study may be a tighter correspondence between the true ambient  
4 temperatures experienced by our sample and the measured outdoor ambient AT given the low air  
5 conditioning prevalence in the Detroit area during the time period. Specifically, in 1993, the last  
6 year for which county-specific American Housing Survey data were available in the Detroit area,  
7 only 32% of Wayne County households had central air conditioning<sup>36</sup>. Furthermore, central air  
8 conditioning prevalence was low in this region despite a “hot-summer humid continental  
9 climate” Köppen Climate Classification<sup>37</sup>, allowing a fairly wide range of warm season AT  
10 exposure over which AT-PTB associations could be examined. In contrast, regions where  
11 associations between temperature and PTB were null in rigorously conducted daily time series  
12 studies included Brandenburg and Saxony, Germany<sup>20</sup> and London, UK<sup>19</sup>, which are in  
13 “temperate oceanic climates,” where all months have average temperatures below 22 °C<sup>37</sup>.  
14 Additionally, Guo et al.<sup>12</sup> found an association between previous-week temperature and PTB  
15 only in the “hot” region of China, defined as having annual average temperatures 19 °C or  
16 higher. Furthermore, in a survival analysis of previous-week temperature and PTB in 18  
17 European cities, the pooled effect estimates were null, and no individual city results were  
18 presented<sup>38</sup>. Again, with the exception of 4 cities, these European cities were all in cooler  
19 climates where all months have average temperatures below 22 °C<sup>37</sup>. This suggests that in  
20 regions where the threat of extremely high temperatures is rare, PTB is not triggered at warm  
21 temperatures, regardless of relative temperature thresholds, even at the same absolute  
22 temperatures at which heat-associated PTB is experienced in warmer climates. This could be due  
23 to differences in emotional stress<sup>39</sup> or physiological stress responses to warm temperatures  
24 between climates. Alternatively, the heterogeneity in effect estimates could be due to regional  
25 differences in the misclassification of the true individually-experienced temperatures by outdoor  
26  
27  
28  
29  
30  
31  
32  
33  
34  
35  
36  
37  
38  
39  
40  
41  
42  
43  
44  
45  
46  
47  
48  
49  
50  
51  
52  
53  
54  
55  
56  
57

1  
2  
3 temperatures. Finally, in the 18-city European study, the PTB rate was only 5%, suggesting that  
4  
5 PTB etiologies may differ between Europe and the U.S., in which case the pregnancies in the  
6  
7 European cohorts could have been less susceptible physiologically to high temperature<sup>38</sup>.  
8  
9

10 Other strengths of our study include our consideration of near-surface solar radiation and  
11  
12 weather conditions as confounders of the total effects of AT, air pollutants as mediators rather  
13  
14 than confounders, and estimation of the direct effects of AT as distinct from those mediated by  
15  
16 air pollutants. By using an analysis technique that was “agnostic” to exposure-mediator  
17  
18 interactions and could accommodate multiple mediators<sup>32</sup>, we found that most if not all of the  
19  
20 effect of AT on PTB is direct, and not mediated by daily changes in air pollution concentrations.  
21  
22 Furthermore, estimating and reporting RERIs, rather than merely reporting statistical interactions  
23  
24 in the models, provided evidence for synergistic effects of high temperature with the independent  
25  
26 risk factors for PTB of prenatal care, smoking status, and age. Interestingly, in this majority-  
27  
28 black population, the risk of PTB with high temperatures was actually lower among black  
29  
30 mothers, after controlling for age, education, smoking status, and prenatal care.  
31  
32  
33  
34

35 Limitations include the fact that the study design does not distinguish, subtypes of  
36  
37 preterm birth based on gestational duration or other classification (e.g. spontaneous versus  
38  
39 medically indicated) or provide information on how much earlier the birth was, e.g., a one-day  
40  
41 premature birth vs. a six-week premature birth. The model used assumes that the  
42  
43 baseline PTB rate does not change over time other than what is being captured with a spline for  
44  
45 year and spline for day-of-year. However, varying the degrees of freedom in the day-of-year  
46  
47 term from 2 to 8, with mild effect. Additionally, the prevalence of characteristics enhancing  
48  
49 vulnerability to PTB may have changed since the study period, thereby decreasing the  
50  
51 generalizability of these results to the present-day population of this region. Future research  
52  
53  
54  
55  
56  
57

1  
2  
3 should employ present-day cohorts of pregnant women linked with refined temperature exposure  
4 measurements, including indoor and neighborhood temperature exposure estimates. These  
5  
6 research refinements will better characterize the thermal exposures and severity of heat-induced  
7  
8 PTB, or more specifically, gestational length, and better identify which pregnancies are  
9  
10 particularly vulnerable to early parturition on hot days.  
11  
12  
13

14  
15 Despite the aforementioned limitations, given the evidence from this and other studies,  
16  
17 pregnant women, in addition to older adults, should be considered as a group vulnerable to short-  
18  
19 term heat health effects when considering housing and climate adaptation measures in Detroit  
20  
21 and similar or warmer climates.  
22  
23  
24  
25  
26  
27  
28  
29  
30  
31  
32  
33  
34  
35  
36  
37  
38  
39  
40  
41  
42  
43  
44  
45  
46  
47  
48  
49  
50  
51  
52  
53  
54  
55  
56  
57



## CONTRIBUTORSHIP STATEMENT

MSO, SAB, HQL, RLW, and LC obtained the data or resources, critiqued the analysis, and reviewed the manuscript. RSB and KCC assisted with preliminary analyses, critiqued the analysis and reviewed the manuscript. AJY performed and drafted preliminary analyses and reviewed the manuscript. CJG directed preliminary analyses, revised the analysis, and revised the manuscript. We thank Leah Comment for early-stage data management and analysis assistance. We also thank Patricia Maina for her contribution to the preterm birth and heat literature review and Sung Kyun Park for early stage advice.

## FUNDING

This work was supported by a Michigan Institute for Clinical and Health Research Postdoctoral Translational Scholars Fellowship (2UL1TR000433-06), National Institute of Environmental Health Sciences grants K99ES026198 and P30ES017885, Cooperative Agreement Number EH001124 from the Centers for Disease Control and Prevention (CDC), National Science Foundation grant 1520803, and CDC/ National Institute for Occupational Safety and Health grant T42 OH008455. Its contents are solely the responsibility of the authors and do not necessarily represent the official views of the CDC or the Michigan Department of Health and Human Services. None of the funders participated in the design, collection, analysis, or interpretation of the data.

## COMPETING INTERESTS

None declared.

## DATA SHARING STATEMENT

Birth outcome data were derived from birth certificate records kept by the Michigan Department of Health and Human Services (MDHHS).<sup>4</sup> These confidential data may be obtained from the MDHHS Division for Vital Records and Health Statistics following completion of a data use agreement. The exposure data are publicly available and were obtained as described in the Methods. The processed exposure data may be requested from C. Gronlund (gronlund@umich.edu).

## REFERENCES

1. Centers for Disease Control and Prevention (CDC). Premature Birth 2017 [updated 11/6/2017. Available from: <https://www.cdc.gov/features/prematurebirth/> accessed Jan 29 2018.
2. Make Your Date Detroit, Center for Advanced Obstetrical Care and Research, Wayne State University. Why This Matters--Facts 2017 [Available from: <https://makeyourdate.org/facts/> accessed Jan 29 2018.
3. Sun XL, Luo XP, Zhao CM, et al. The association between fine particulate matter exposure during pregnancy and preterm birth: a meta-analysis. *BMC Pregnancy Childbirth* 2015;15:12. doi: 10.1186/s12884-015-0738-2
4. Le HQ, Batterman SA, Wirth JJ, et al. Air pollutant exposure and preterm and term small-for-gestational-age births in Detroit, Michigan: Long-term trends and associations. *Environment International* 2012;44:7-17. doi: <http://dx.doi.org/10.1016/j.envint.2012.01.003>
5. Carolan-Olah M, Frankowska D. High environmental temperature and preterm birth: a review of the evidence. *Midwifery* 2014;30(1):50-9. doi: 10.1016/j.midw.2013.01.011 [published Online First: 2013/03/12]
6. Strand LB, Barnett AG, Tong S. The influence of season and ambient temperature on birth outcomes: a review of the epidemiological literature. *Environ Res* 2011;111(3):451-62. doi: 10.1016/j.envres.2011.01.023 [published Online First: 2011/02/22]
7. McMorris T, Swain J, Smith M, et al. Heat stress, plasma concentrations of adrenaline, noradrenaline, 5-hydroxytryptamine and cortisol, mood state and cognitive performance. *International Journal of Psychophysiology* 2006;61(2):204-15. doi: <https://doi.org/10.1016/j.ijpsycho.2005.10.002>
8. Behrman RE, Adashi EY, Allen MC, et al. Preterm Birth: Causes, Consequences, and Prevention. In: Medicine Io, ed. Report Brief. Washington, DC: Institute of Medicine, 2006.
9. Stan C, Boulvain M, Hirsbrunner-Amagbaly P, et al. Hydration for treatment of preterm labour. *Cochrane Database Syst Rev* 2002;2
10. Dadvand P, Basagana X, Sartini C, et al. Climate extremes and the length of gestation. *Environ Health Perspect* 2011;119(10):1449-53. doi: 10.1289/ehp.1003241 [published Online First: 2011/06/11]
11. Strand LB, Barnett AG, Tong S. Maternal exposure to ambient temperature and the risks of preterm birth and stillbirth in Brisbane, Australia. *Am J Epidemiol* 2012;175(2):99-107. doi: 10.1093/aje/kwr404 [published Online First: 2011/12/15]
12. Guo TJ, Wang YY, Zhang HG, et al. The association between ambient temperature and the risk of preterm birth in China. *Sci Total Environ* 2018;613:439-46. doi: 10.1016/j.scitotenv.2017.09.104
13. Mathew S, Mathur D, Chang AB, et al. Examining the Effects of Ambient Temperature on Pre-Term Birth in Central Australia. *International Journal of Environmental Research and Public Health* 2017;14(2) doi: 10.3390/ijerph14020147
14. Ha SD, Liu DP, Zhu YY, et al. Ambient Temperature and Early Delivery of Singleton Pregnancies. *Environmental Health Perspectives* 2017;125(3):453-59. doi: 10.1289/ehp97
15. Basu R, Chen H, Li DK, et al. The impact of maternal factors on the association between temperature and preterm delivery. *Environmental Research* 2017;154:109-14. doi: 10.1016/j.envres.2016.12.017

16. Schifano P, Asta F, Dadvand P, et al. Heat and air pollution exposure as triggers of delivery: A survival analysis of population-based pregnancy cohorts in Rome and Barcelona. *Environment International* 2016;88:153-59. doi: 10.1016/j.envint.2015.12.013
17. He JR, Liu Y, Xia XY, et al. Ambient Temperature and the Risk of Preterm Birth in Guangzhou, China (2001-2011). *Environ Health Perspect* 2015 doi: 10.1289/ehp.1509778 [published Online First: 2015/12/17]
18. Arroyo V, Diaz J, Ortiz C, et al. Short term effect of air pollution, noise and heat waves on preterm births in Madrid (Spain). *Environmental Research* 2016;145:162-68. doi: 10.1016/j.envres.2015.11.034
19. Lee SJ, Hajat S, Steer PJ, et al. A time-series analysis of any short-term effects of meteorological and air pollution factors on preterm births in London, UK. *Environ Res* 2008;106(2):185-94. doi: 10.1016/j.envres.2007.10.003 [published Online First: 2007/11/21]
20. Wolf J, Armstrong B. The association of season and temperature with adverse pregnancy outcome in two German states, a time-series analysis. *PLoS One* 2012;7(7):e40228. doi: 10.1371/journal.pone.0040228 [published Online First: 2012/07/14]
21. Porter KR, Thomas SD, Whitman S. The relation of gestation length to short-term heat stress. *American Journal of Public Health* 1999;89(7):1090-92. doi: 10.2105/ajph.89.7.1090
22. Buckley JP, Samet JM, Richardson DB. Commentary: Does air pollution confound studies of temperature? *Epidemiology* 2014;25(2):242-5. doi: 10.1097/ede.0000000000000051 [published Online First: 2014/02/04]
23. Abel D, Holloway T, Kladar RM, et al. Response of Power Plant Emissions to Ambient Temperature in the Eastern United States. *Environ Sci Technol* 2017;51(10):5838-46. doi: 10.1021/acs.est.6b06201
24. Environmental Protection Agency (EPA). Ozone Pollution and Your Patient's Health: What is Ozone? 2018 [Available from: <https://www.epa.gov/ozone-pollution-and-your-patients-health/what-ozone> accessed December 20 2018.
25. National Climatic Data Center. Integrated Surface Database Lite 2010 [Available from: <http://www.ncdc.noaa.gov/oa/climate/isd/index.php> accessed July 2010.
26. Oswald EM, Rood RB, Zhang K, et al. An investigation into the spatial variability of near-surface air temperatures in the Detroit, MI metropolitan region. *J Appl Meteorol Climatol* 2012;51(7):1290-304. doi: 10.1175/JAMC-D-11-0127.1
27. National Solar Radiation Database, 1991-2010 Update [Available from: [https://rredc.nrel.gov/solar/old\\_data/nsrdb/](https://rredc.nrel.gov/solar/old_data/nsrdb/) accessed August 25 2017.
28. Wilcox S. National Solar Radiation Database 1991-2010 Update: User's Manual. In: National Renewable Energy Laboratory, ed.: U.S. Department of Energy, Office of Energy Efficiency & Renewable Energy, 2012.
29. PRISM Climate Group. PRISM Climate Data 2016 [Available from: <http://www.prism.oregonstate.edu/> accessed March 6 2016.
30. U.S. Environmental Protection Agency. AirData 2015 [Available from: [http://aqsdr1.epa.gov/aqswweb/aqstmp/airdata/download\\_files.html](http://aqsdr1.epa.gov/aqswweb/aqstmp/airdata/download_files.html) accessed Feb 5 2015.
31. Avalos LA, Chen H, Li DK, et al. The impact of high apparent temperature on spontaneous preterm delivery: a case-crossover study. *Environmental Health* 2017;16 doi: 10.1186/s12940-017-0209-5

- 1  
2  
3 32. Nguyen QC, Osypuk TL, Schmidt NM, et al. Practical Guidance for Conducting Mediation  
4 Analysis With Multiple Mediators Using Inverse Odds Ratio Weighting. *American*  
5 *Journal of Epidemiology* 2015;181(5):349-56. doi: 10.1093/aje/kwu278  
6  
7 33. Nie L, Chu H, Li F, et al. Relative Excess Risk Due to Interaction: Resampling-based  
8 Confidence Intervals. *Epidemiology* 2010;21(4):552-56.  
9  
10 34. Kent ST, McClure LA, Zaitchik BF, et al. Heat Waves and Health Outcomes in Alabama  
11 (USA): The Importance of Heat Wave Definition. *Environ Health Perspect* 2013 doi:  
12 10.1289/ehp.1307262 [published Online First: 2013/11/26]  
13  
14 35. Schifano P, Lallo A, Asta F, et al. Effect of ambient temperature and air pollutants on the risk  
15 of preterm birth, Rome 2001-2010. *Environ Int* 2013;61:77-87. doi:  
16 10.1016/j.envint.2013.09.005 [published Online First: 2013/10/10]  
17  
18 36. United States. Bureau of the Census. American Housing Survey, 1993: MSA Core and  
19 Supplement File: [distributor], 2006.  
20  
21 37. Peel MC, Finlayson BL, McMahon TA. Updated world map of the Köppen-Geiger climate  
22 classification. *Hydrol Earth Syst Sci* 2007;11(5):1633-44. doi: 10.5194/hess-11-1633-  
23 2007  
24  
25 38. Giorgis-Allemand L, Pedersen M, Bernard C, et al. The Influence of Meteorological Factors  
26 and Atmospheric Pollutants on the Risk of Preterm Birth. *American Journal of*  
27 *Epidemiology* 2017;185(4):247-58. doi: 10.1093/aje/kww141  
28  
29 39. Lin YF, Hu WJ, Xu J, et al. Association between temperature and maternal stress during  
30 pregnancy. *Environmental Research* 2017;158:421-30. doi: 10.1016/j.envres.2017.06.034  
31  
32  
33  
34  
35  
36  
37  
38  
39  
40  
41  
42  
43  
44  
45  
46  
47  
48  
49  
50  
51  
52  
53  
54  
55  
56  
57  
58  
59  
60

## TABLES

Table 1. Demographics of Preterm Births in Detroit, MI Study Area, May-September, 1991-2001.

|                          | N     | %    |
|--------------------------|-------|------|
| Total                    | 9,053 | 100  |
| Maternal Race            |       |      |
| White                    | 2,443 | 27.0 |
| Black                    | 6,433 | 71.1 |
| Other                    | 177   | 1.9  |
| Maternal Smoking Status  |       |      |
| Non-Smoker               | 6,621 | 73.1 |
| Smoker                   | 2,345 | 25.9 |
| Missing                  | 87    | 1.0  |
| Level of Prenatal Care   |       |      |
| Prenatal Care            | 5,037 | 55.6 |
| Late or No Prenatal Care | 2,960 | 32.7 |
| Missing                  | 1,056 | 11.7 |
| Maternal Age             |       |      |
| 16-19 years              | 1,782 | 19.7 |
| 20-29 years              | 4,821 | 53.2 |
| ≥ 30 years               | 2,450 | 27.1 |
| Maternal Education       |       |      |
| Less than High School    | 3,485 | 38.5 |
| High School or Higher    | 5,451 | 60.2 |
| Missing                  | 117   | 1.3  |

Table 2. Daily Exposures Among the PTB Cases, Detroit, MI Area, May-September, 1991-2001.

|                                                                          | N     | Median | Mean  | Min  | Max   |
|--------------------------------------------------------------------------|-------|--------|-------|------|-------|
| Two-day mean apparent temperature, °C                                    | 9,053 | 18.6   | 18.0  | 3.1  | 28.0  |
| Two-day mean apparent temperature 18.6 °C and above                      | 9,053 | 0.1    | 1.5   | 0.0  | 9.4   |
| Mean solar radiation (W/m <sup>2</sup> )                                 | 9,053 | 226.4  | 217.7 | 38.1 | 352.8 |
| Total precipitation (mm) <sup>a</sup>                                    | 9,053 | 0.0    | 0.4   | 0.0  | 56.7  |
| Mean wind speed (m/s)                                                    | 9,053 | 3.6    | 3.6   | 0.1  | 8.0   |
| Maximum 8-hour average ozone (ppb)                                       | 9,039 | 43.0   | 44.8  | 3.2  | 102.0 |
| Mean particulate matter, 10 µm or less (µg/m <sup>3</sup> ) <sup>a</sup> | 8,331 | 39.0   | 38.5  | 8.0  | 158.0 |
| Mean nitrogen dioxide (ppb) <sup>a</sup>                                 | 8,956 | 18.4   | 19.7  | 0.0  | 72.8  |

<sup>a</sup> Geometric means are provided. Values were natural-log-transformed in the regression analyses.

Table 3. Relative Risk of Preterm Birth and Percent of Preterm Births Attributable to 2-day Mean Apparent Temperature (AT) on 24.9 °C days vs. 18.6 °C days, Detroit, MI Area, May-September, 1991-2001.

| Model | Knots in day-of-year spline | Covariates                                                                    | Relative Risk (95% Confidence Interval) | Percent attributable (95% Confidence Interval) |
|-------|-----------------------------|-------------------------------------------------------------------------------|-----------------------------------------|------------------------------------------------|
| 1     | 2                           | none                                                                          | 1.11 (1.02, 1.09)                       | 9.9 (2.4, 16.4)                                |
| 2     | 5                           | none                                                                          | 1.11 (1.03, 1.20)                       | 9.8 (2.6, 16.5)                                |
| 3     | 8                           | none                                                                          | 1.09 (1.01, 1.18)                       | 8.1 (1.0, 17.6)                                |
| 4     | 5                           | solar radiation, wind speed, precipitation                                    | 1.12 (1.04, 1.21)                       | 10.6 (3.8, 17.2)                               |
| 5     | 5                           | solar radiation, wind speed, precipitation, inverse-odds weights <sup>s</sup> | 1.12 (1.02, 1.21)                       | 10.4 (2.2, 17.5)                               |

<sup>s</sup>Inverse-odds weights calculated from the predicted odds of AT given lag day 0 and 1 of ozone, PM<sub>10</sub> and NO<sub>2</sub>.

Table 4. Relative Excess Risk Due to Interaction (RERI) for Interactions of 2-Day Mean Apparent Temperature (AT) on 24.9 °C days vs. 18.6 °C Days with Maternal Characteristics, Detroit, MI Area, May-September, 1991-2001.

| Characteristic    | RERI | 95% Confidence Interval |
|-------------------|------|-------------------------|
| Black race        | -1.5 | -1.9, -1.0              |
| Age 16-19 years   | 0.50 | 0.22, 0.76              |
| Age > 30 years    | 0.34 | 0.08, 0.65              |
| Low prenatal care | 0.44 | 0.19, 0.65              |
| No high school    | 0.19 | -0.06, 0.43             |
| Smoker            | 0.52 | 0.29, 0.76              |

With 5 knots in the day-of-year spline.

1  
2  
3  
4  
5  
6  
7  
8  
9  
10  
11  
12  
13  
14  
15  
16  
17  
18  
19  
20  
21  
22  
23  
24  
25  
26  
27  
28  
29  
30  
31  
32  
33  
34  
35  
36  
37  
38  
39  
40  
41  
42  
43  
44  
45  
46  
47  
48  
49  
50  
51  
52  
53  
54  
55  
56  
57  
58  
59  
60

FIGURE LEGENDS

Figure 1. Directed Acyclic Graph of the Causal Framework for Mediation of the Association Between Apparent Temperature (AT) and Preterm Birth (PTB) by Air Pollutants.

For peer review only

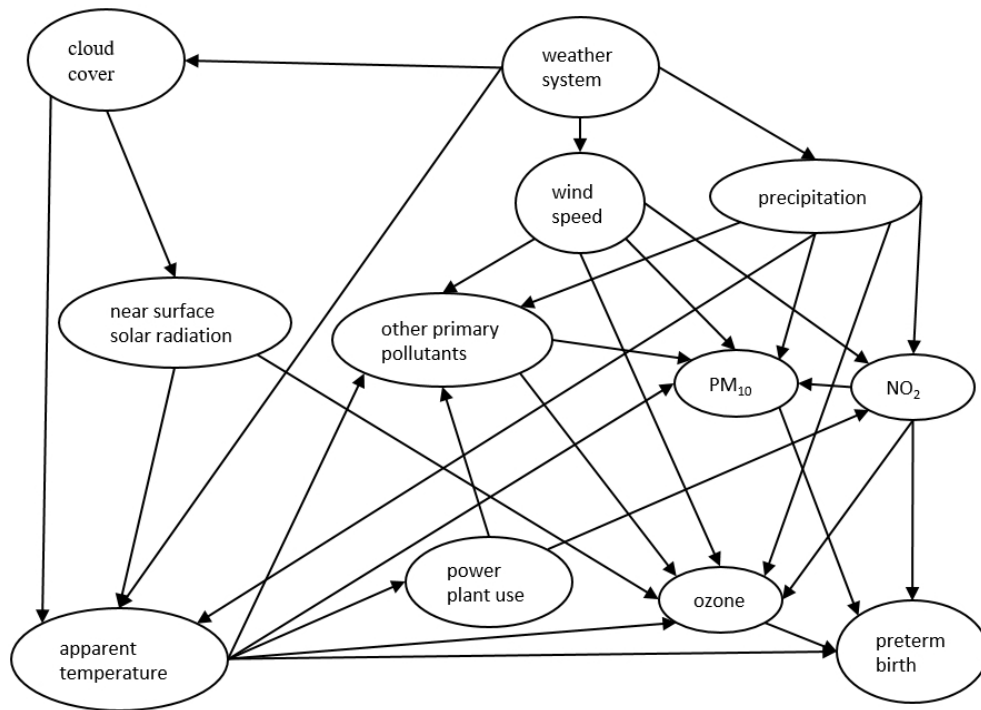

PM<sub>10</sub> = particulate matter less than 10 microns in aerodynamic diameter

NO<sub>2</sub> = nitrogen dioxide



# BMJ Open

## Total and direct associations between high temperatures and preterm births in Detroit, Michigan

|                                 |                                                                                                                                                                                                                                                                                                                                                                                                                                                                                                                                                                                                         |
|---------------------------------|---------------------------------------------------------------------------------------------------------------------------------------------------------------------------------------------------------------------------------------------------------------------------------------------------------------------------------------------------------------------------------------------------------------------------------------------------------------------------------------------------------------------------------------------------------------------------------------------------------|
| Journal:                        | <i>BMJ Open</i>                                                                                                                                                                                                                                                                                                                                                                                                                                                                                                                                                                                         |
| Manuscript ID                   | bmjopen-2019-032476.R1                                                                                                                                                                                                                                                                                                                                                                                                                                                                                                                                                                                  |
| Article Type:                   | Original research                                                                                                                                                                                                                                                                                                                                                                                                                                                                                                                                                                                       |
| Date Submitted by the Author:   | 14-Nov-2019                                                                                                                                                                                                                                                                                                                                                                                                                                                                                                                                                                                             |
| Complete List of Authors:       | Gronlund, Carina; University of Michigan Institute for Social Research, Survey Research Center<br>Yang, Alyssa; Urban Indian Health Institute<br>Conlon, Kathryn; University of California Davis<br>Bergmans, Rachel S.; University of Michigan Medical School,<br>Le, Hien; Chemours Co<br>Batterman, Stuart; University of Michigan, Environmental Health Sciences<br>Wahl, Robert; Michigan Department of Health and Human Services<br>Cameron, Lorraine; Michigan Department of Health and Human Services<br>O'Neill, Marie; University of Michigan, Environmental Health Sciences and Epidemiology |
| <b>Primary Subject Heading</b>: | Epidemiology                                                                                                                                                                                                                                                                                                                                                                                                                                                                                                                                                                                            |
| Secondary Subject Heading:      | Public health                                                                                                                                                                                                                                                                                                                                                                                                                                                                                                                                                                                           |
| Keywords:                       | Maternal medicine < OBSTETRICS, STATISTICS & RESEARCH METHODS, EPIDEMIOLOGY                                                                                                                                                                                                                                                                                                                                                                                                                                                                                                                             |
|                                 |                                                                                                                                                                                                                                                                                                                                                                                                                                                                                                                                                                                                         |

SCHOLARONE™  
Manuscripts

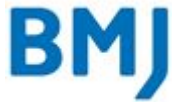

I, the Submitting Author has the right to grant and does grant on behalf of all authors of the Work (as defined in the below author licence), an exclusive licence and/or a non-exclusive licence for contributions from authors who are: i) UK Crown employees; ii) where BMJ has agreed a CC-BY licence shall apply, and/or iii) in accordance with the terms applicable for US Federal Government officers or employees acting as part of their official duties; on a worldwide, perpetual, irrevocable, royalty-free basis to BMJ Publishing Group Ltd ("BMJ") its licensees and where the relevant Journal is co-owned by BMJ to the co-owners of the Journal, to publish the Work in this journal and any other BMJ products and to exploit all rights, as set out in our [licence](#).

The Submitting Author accepts and understands that any supply made under these terms is made by BMJ to the Submitting Author unless you are acting as an employee on behalf of your employer or a postgraduate student of an affiliated institution which is paying any applicable article publishing charge ("APC") for Open Access articles. Where the Submitting Author wishes to make the Work available on an Open Access basis (and intends to pay the relevant APC), the terms of reuse of such Open Access shall be governed by a Creative Commons licence – details of these licences and which [Creative Commons](#) licence will apply to this Work are set out in our licence referred to above.

Other than as permitted in any relevant BMJ Author's Self Archiving Policies, I confirm this Work has not been accepted for publication elsewhere, is not being considered for publication elsewhere and does not duplicate material already published. I confirm all authors consent to publication of this Work and authorise the granting of this licence.

1  
2  
3 TITLE PAGE  
45 **Title**6  
7 Total and direct associations between high temperatures and preterm births in Detroit, Michigan  
89 **Authors**10  
11 Carina J. Gronlund<sup>1</sup>, Alyssa J. Yang<sup>2</sup>, Kathryn C. Conlon<sup>3</sup>, Rachel S. Bergmans<sup>4</sup>, Hien Q. Le<sup>5</sup>,  
12 Stuart A. Batterman<sup>6</sup>, Robert L. Wahl<sup>7</sup>, Lorraine Cameron<sup>7</sup>, Marie S. O'Neill<sup>6,8</sup>  
1314  
15 <sup>1</sup>Corresponding author:16 University of Michigan Institute for Social Research  
17 Survey Research Center, Social Environment and Health Program  
18 426 Thompson St. Rm 3340  
19 Ann Arbor, MI 48104  
20 [gronlund@umich.edu](mailto:gronlund@umich.edu)  
21 734-615-9215  
2223  
24 <sup>2</sup>Urban Indian Health Institute, Seattle, WA, USA  
2526  
27 <sup>3</sup>University of California at Davis, Davis, CA, USA  
2829  
30 <sup>4</sup>Department of Psychiatry, University of Michigan, Ann Arbor, MI, USA  
3132  
33 <sup>5</sup>Health Services/Epidemiology, The Chemours Company, Wilmington, DE, USA  
3435  
36 <sup>6</sup>Department of Environmental Health Sciences, University of Michigan, Ann Arbor, MI, USA  
3738  
39 <sup>7</sup>Michigan Department of Health and Human Services, Lansing, MI, USA  
4041  
42 <sup>8</sup>Department of Epidemiology, University of Michigan, Ann Arbor, MI, USA  
43  
44  
45  
46  
47  
48  
49  
50  
51  
52  
53  
54  
55  
56  
5758 Word count: 3,815  
59  
60

## ABSTRACT

Background: Preterm births (PTBs) represent significant health risks, and several studies have found associations between high outdoor temperatures and PTB. We estimated both the total and natural direct effects (independent of particulate matter, ozone and nitrogen dioxide air pollutants) of the prior two-day mean apparent temperature (AT) on PTB in the Detroit, Michigan area for the warm months (May to September), 1991-2001. We evaluated effect modification by maternal age, race, education, smoking status, and prenatal care.

Methods: We used a time series Poisson regression with splines of AT, wind speed, solar radiation, and citywide average precipitation to estimate total effects. To accommodate multiple mediators and exposure-mediator interactions, AT inverse odds weights, predicted by meteorological and air pollutant covariates, were added in a subsequent model to estimate direct effects.

Results: At 24.9 °C relative to 18.6 °C, 10.6% (95% Confidence Interval: 3.8%, 17.2%) of PTBs were attributable to the total effects of AT, and 10.4% (95% CI: 2.2%, 17.5%) to direct effects.

Relative excess risks of interaction indicated that the risk of PTB with increasing temperature above 18.6 °C was significantly lower among black mothers and higher among mothers less than 19, older than 30, with late or no prenatal care, and who smoked.

Conclusion: This additional evidence of a direct association between high temperature and PTB may motivate public health interventions to reduce extreme heat exposures among pregnant women, particularly among those who may have enhanced vulnerability.

## STRENGTHS AND LIMITATIONS OF THIS STUDY

- We expand on a growing literature demonstrating total effects of temperature on PTB by examining mediation of the total temperature effect by air pollutants.
- We did not have geographic identifiers for the study participants at a level as fine as residential address or indoor exposure information, and we therefore assigned time-varying environmental exposures at an outdoor, citywide level. However, a low prevalence of residential air conditioning (32%) in the study time period suggests that outdoor exposures may have more accurately reflected indoor exposures than in more recent studies.
- We account for multiple mediators and potential exposure-mediator interactions by applying a straightforward technique—the use of inverse odds weights—to separate the total effects of temperature on PTB from the direct effects.
- We used methods examining potential synergistic effects, as opposed to just examining statistical interactions, by other characteristics that confer vulnerability to PTB.

## INTRODUCTION

Preterm births (PTBs) are defined as births that occur before 37 gestational weeks. Babies born prematurely are at greater risk of infant death and impaired health, such as cerebral palsy and impairments of cognitive development, hearing, vision, respiration, and digestion. In 2016, 10% of babies were born prematurely, with statewide rates ranging 7.8-13.7%<sup>1</sup>. Within-state disparities in preterm birth rates can be greater: from 1990-2010, 18% of births in Detroit, Michigan were PTBs<sup>2</sup>.

Certain risk factors are known to be associated with PTB, such as cigarette smoking, alcohol use, hypertension, and diabetes<sup>1</sup>. Air pollution is associated with PTB<sup>3,4</sup>, and higher ambient temperature has been proposed as a risk factor for PTB<sup>5,6</sup>.

High ambient temperature could pose a risk for PTB through several biological pathways, including stress and dehydration pathways.<sup>7,8,9</sup> Several studies have evaluated possible associations between high ambient temperature and PTB, with mixed results<sup>5,6</sup>. Studies in cities in Australia, Quebec, China, Belgium, Italy, Spain and across the U.S. have all found significant positive associations between hot temperatures within the week preceding delivery and PTB<sup>5,6,10-18</sup>. High ambient temperatures in the month of conception and the third trimester were also positively associated with PTB in Changsha, China {Zheng, 2018 #3222;Zhong, 2018 #3223}. However, earlier, rigorously conducted time series analyses of temperature and PTB in Germany and in London, England did not find associations<sup>19,20</sup>. Likewise, in Chicago, Illinois, Porter et al. found no effect of the July 1995 heat wave on gestational length<sup>21</sup>. Sources of heterogeneity among these effect estimates may include differences in study design, prevailing climate and regional adaptation, population structure, exposure assessment, critical windows of exposure considered, and methods of gestational age assessment<sup>14</sup>.

1  
2  
3 Studies often control for air pollution exposure, although the argument has been made  
4 that treating air pollutants as confounders of temperature-health associations is inappropriate  
5 given that high temperatures can contribute to increased concentrations of some air pollutants,  
6 and both temperature and air pollution are affected by sunlight<sup>22</sup>. Differences in the manner in  
7 which air pollutants are accounted for in the temperature-PTB modeling may also account for  
8 some of the heterogeneity observed in this literature.  
9  
10  
11  
12  
13  
14  
15

16  
17 We investigated the association between high AT and PTB in the Detroit, Michigan area,  
18 estimating both the total effects of temperature as well as the natural direct effects, excluding  
19 potential mediation effects by the air pollutants ozone, particulate matter with an aerodynamic  
20 diameter of less than 10 micrometers (PM<sub>10</sub>), and nitrogen dioxide (NO<sub>2</sub>). We further examined  
21 whether the maternal risk factors of age, race, education, smoking, and level of prenatal care  
22 modified the association between high AT and PTB.  
23  
24  
25  
26  
27  
28  
29

## 30 METHODS

### 31 **Outcome Variable**

32  
33 Birth outcome data were derived from birth certificate records kept by the Michigan  
34 Department of Health and Human Services<sup>4</sup>. This sample population included live, singleton  
35 births that occurred from January 1, 1991 to December 31, 2001 in ZIP codes within 4 km of one  
36 of three air quality monitors (Allen Park, Linwood, and East 7 Mile) in and bordering Detroit,  
37 Michigan<sup>4</sup>. In the final data set, births were categorized as term vs. PTB, defined as births that  
38 were less than 37 gestational weeks. We limited the data set to births that occurred May-  
39 September, in order to focus on heat exposures.  
40  
41  
42  
43  
44  
45  
46  
47  
48  
49  
50

### 51 **Identification of Confounders and Mediators**

52  
53 A directed acyclic graph (DAG) was constructed to define the causal framework and  
54 elucidate potential mediating effects of air pollutants in the association between AT and PTB  
55  
56  
57

(Figure 1). In this DAG, AT is the exposure of interest and PTB the outcome of interest. Given suspected associations between PTB and precipitation<sup>23</sup> and between PTB and vitamin D, for which one source is solar radiation<sup>24</sup>, as well as causal meteorological relationships between AT, solar radiation, and precipitation via a parent weather system, precipitation and solar radiation are potential confounders of the AT-PTB association. In this DAG, primary and secondary air pollutants are the hypothesized mediators of the temperature-PTB association given that: 1) they have been associated with the health outcome in other locations<sup>3</sup> and in this dataset in the third trimester<sup>4</sup>, 2) high temperature enhances the rate of ground-level ozone formation, and 3) power plant emissions increase when temperatures rise to accommodate additional demand for air conditioning<sup>25</sup>. Furthermore, the weather system is a causal parent to both AT and the pollutants and therefore a potential confounder given that meteorological conditions such as wind speed, precipitation, and cloud cover can affect pollutant formation and exposure as well as sunlight, which increases AT and promotes ozone formation<sup>26</sup>. Therefore, a model characterizing the *total effect* of AT would need to include the confounders of solar radiation, wind speed, and precipitation but not include pollutants. A model characterizing the *direct effect* of AT, independent of air pollution mediation, would need to include these mediators. The modeling used to characterize direct and indirect effects is further described in the Statistical Analysis section below.

### **Exposure Variables**

Daily mean temperature, dew point temperature, and wind speed were obtained from the National Center for Environmental Information<sup>27</sup>. Data from the Detroit City Airport was used due to its proximity to the mothers' ZIP codes of residence. To better represent thermal discomfort, we used apparent temperature (AT) rather than air temperature. AT is similar to heat index, and increases with both air temperature and relative humidity. AT was calculated using



1  
2  
3 the following formula:  $[-2.653 + (0.994 * \text{Temperature in } ^\circ\text{C}) + 0.0153 * (\text{Dew Point Temperature}$   
4  $\text{in } ^\circ\text{C})^2]$ <sup>28,29</sup> From Detroit City Airport, 11% and 15% of temperatures and dew points were  
5  
6 missing, respectively, so data from Detroit Metropolitan Airport were used to replace these  
7  
8 missing data. Among non-missing values, daily AT from Detroit City Airport was highly  
9  
10 correlated with that from Detroit Metropolitan Airport (Pearson's correlation coefficient = 0.98).  
11  
12  
13

14  
15 The total amount of direct and diffuse solar radiation received on a horizontal surface  
16  
17 during each 60-minute period at the Detroit City Airport was retrieved from the National Solar  
18  
19 Radiation Database<sup>30</sup>. These data were modeled from meteorological data including cloud cover,  
20  
21 aerosol, and ozone data from sources such as sun photometers, satellites and albedo data<sup>31</sup>. We  
22  
23 further estimated daily means from the hourly solar radiation values.  
24  
25

26  
27 Daily precipitation totals were obtained from Oregon State University's PRISM Climate  
28  
29 Group<sup>32</sup>. These are modeled at a 4-km resolution based on observations and a climatologically-  
30  
31 aided interpolation process. Rasters were cropped to the City of Detroit and daily citywide  
32  
33 averages were calculated.  
34

35  
36 Daily eight-hour maximum ozone and daily mean NO<sub>2</sub> and PM<sub>10</sub> concentrations were  
37  
38 obtained from the Environmental Protection Agency for all Wayne County, Michigan monitors  
39  
40 and averaged by day and pollutant<sup>33</sup>. Only daily monitor values for which at least a single daily  
41  
42 or 18 of the 24-hourly values were available were retained, resulting in substantial missingness,  
43  
44 which was addressed in the statistical analysis below.  
45

46  
47 Birth certificate data also included date of birth and maternal age group (16-19, 20-29,  
48  
49 and over 30), race (black or white), smoking status (smoker vs. non-smoker), education level  
50  
51 (less than high school vs. high school or higher), and level of prenatal care (prenatal care vs. late  
52  
53 or no prenatal care), which were used in analyses of effect modification.  
54  
55  
56  
57

### Patient and Public Involvement

Patients were not involved. This research was deemed exempt from review by the University of Michigan Institutional Review Board.

### Statistical Analysis

Case-crossover analysis is commonly used in studies of PTB and temperature<sup>14 15 34</sup>. Because PTB is not a rare event in this particular population, the case-crossover odds ratios would not approximate risk ratios. Therefore, we used a time series design with Poisson regression, controlling for seasonal and long-term variations in PTB counts with a cubic b-spline for day-of-year, with 5, 2 or 8 knots, and a cubic b-spline for year with 2 knots. AT exposure was characterized as two-day mean AT, or the mean of the AT values on the day of and the day before birth. For AT and the covariates, non-linearity was considered by initially modeling each as a b-spline with three knots and selecting a single knot for subsequent modeling of the covariate as a piecewise linear spline when substantial nonlinearity was visually evident. The 95% confidence intervals (CIs) were constructed from the 2.5<sup>th</sup> and 97.5<sup>th</sup> percentiles of 500 bootstrapped samples. In sensitivity analyses, given its wide usage for this research question, a time-stratified case-crossover design was used with time-strata defined as two- or three-week periods.

To account for missing air pollutant values, we conducted multiple imputations using chained equations. We used a more general model including lag days 0-2 of the above meteorological and pollutant values. The air pollutant values were well-predicted by lag days 0-2 meteorology and air pollution values, and from examinations of trace plots, or scatter plots of successive parameter estimates, we determined that a total of three imputations following two burn-ins was sufficient. All subsequent analyses were conducted on each of the three resulting data sets.

1  
2  
3 To estimate the total effects of AT, we included terms for solar radiation, wind speed, and  
4 precipitation in the Poisson model, which blocked all of the paths in the DAG from AT to PTB  
5 that did not pass through the mediators (Figure 1). However, to estimate natural direct effects, we  
6 used a more generalizable technique—inverse odds weighting—given that we had multiple  
7 mediators and as well as potential exposure-mediator interactions<sup>35</sup>. In this technique, we first fit  
8 a standard linear regression of two-day mean AT (meanAT01) on the air pollutant mediators and  
9 covariates (solar radiation, wind speed, precipitation). We then estimated:

$$\text{inverse odds} = 1 / \exp(\text{predicted meanAT01} / \sigma^2) \quad \text{Equation 1}$$

19  
20 where  $\sigma^2$  was the model mean squared-error. The inverse odds were then used as weights in the  
21 subsequent analysis of PTB and AT with the other covariates but not the air pollutants. The  
22 weights render AT independent of the mediators, thereby allowing the estimation of AT  
23 separately from the effects of the air pollutant mediators on PTB. Total and direct effects were  
24 calculated from each of the three imputed data sets and then each averaged.

25  
26 To assess the public health impact of AT on PTB, we estimated the attributable fraction  
27 (AF), or the percent of PTB attributable to high AT among women exposed to the high AT. The  
28 AF was estimated as:  $1 / (1 - RR) * 100\%$  where the RR was for the 95<sup>th</sup> percentile (24.9 °C)  
29 relative to the 50<sup>th</sup> percentile (18.6 °C) of May-September two-day mean AT. Indirect effects  
30 were estimated as the difference between the total effects and the direct effects. The 95%  
31 confidence intervals (CIs) were constructed from the 2.5<sup>th</sup> and 97.5<sup>th</sup> percentiles of 500  
32 bootstrapped samples.

33  
34 To understand how the effects varied among maternal subgroups, or effect modification  
35 of the PTB-AT association, we simultaneously included interaction terms between the AT spline  
36 and the indicator variables for black race, age 16-19, age 30 years or older, low prenatal care  
37  
38  
39  
40  
41  
42  
43  
44  
45  
46  
47  
48

(late or no prenatal care), current smoker, and no high school education. We expanded the data set such that we had rows for each unique combination of date and daily exposures, race, age group, education, prenatal care, and smoking status. Given the large number of zero counts, we specified a negative binomial distribution rather than a Poisson distribution. For public health significance, we were interested in the absolute rather than the relative increase in PTB risk due to synergistic effects between temperature and each modifier of interest. Therefore we focused on *additive*, rather than *multiplicative*, interactions. Relative excess risk due to interaction (RERI)<sup>36</sup> was calculated for each potential modifier as:

$$RR_{AT=95th,EM=1} - RR_{AT=95th,EM=0} - RR_{AT=50th,EM=1} + 1 \quad \text{Equation 2}$$

where EM was the effect modifier of interest and the denominator of each RR was the risk at the 50<sup>th</sup> percentile of AT (18.6 °C) and the absence of the modifier (EM = 0). RERI confidence CIs were bootstrapped from 1,000 samples. Analyses were conducted in SAS 9.4 (Copyright 2016, SAS Institute Inc., Cary, NC, USA) using PROC GLIMMIX, which allows for multiple splines in a Poisson regression. Figure 2 was constructed in R (R Foundation for Statistical Computing, Vienna, Austria) using the *dlnm* package<sup>37</sup> following modeling using the *glm.nb* function in the *MASS* package<sup>38</sup>.

## RESULTS

There were 9,053 singleton PTBs in this Detroit-area sample, May-September, 1991-2001 (Table 1). There were fewer PTBs in September compared to the other months, and consistent with Detroit's population decline, the number of PTBs declined with time. Considering individual characteristics, 27.0% of the PTBs were among white mothers and 71.1% were among black mothers. A majority of the mothers were non-smokers (73.1%), had prenatal care (55.6%), were 20-29 years of age (53.2%) and had at least a high school education (60.2%) (Table 1).

1  
2  
3 On average, AT exposure was 18.0 °C, and among the days when AT was greater than  
4  
5 the time-period-specific daily median of 18.6 °C (i.e., for the upper end of the temperature  
6  
7 spline), AT averaged 1.5 °C higher. A total of 53% of the cases occurred on days with no rain, so  
8  
9 the geometric mean precipitation was 0.4 mm. The mean ozone concentration was 44.8 ppb and  
10  
11 the maximum was 102 ppb (Table 2). In examining the daily time series of ozone over the study  
12  
13 period, the three-year running averages of the fourth highest daily 8-hour maximum value of  
14  
15 ozone ranged from 77 to 92 ppb, suggesting that the (current) National Ambient Air Quality  
16  
17 Standards (70 ppb) had been exceeded in each year of the study.  
18  
19

20  
21  
22 In a crude model of the association between PTB and AT where AT was modeled  
23  
24 flexibly as a b-spline with 3 df, we found a nonlinear association, with approximately null effects  
25  
26 below 18-19 C and an increasingly stronger positive association at higher temperatures (Figure  
27  
28 2). To address potential sensitivity of the results to control for season, we varied the df in the  
29  
30 day-of-year term, using 2, 5, and 8 df. The results were not highly sensitive to this choice, with  
31  
32 the point estimates of the percentages of PTB attributable to AT ranging only from 8.1% (8 df) to  
33  
34 9.9% (2 df) among pregnant women exposed to days when AT was 24.9 °C vs exposure on 18.6  
35  
36 °C days (Table 3). In case-crossover analyses, the resulting odds ratios were also statistically  
37  
38 significantly greater than 1.0, regardless of whether the time strata were two-week, three-week,  
39  
40 or one-month periods (Supplemental Material Table S1). However, the odds ratios were greater  
41  
42 in magnitude than the risk ratios estimated in the time series design, which is expected, given  
43  
44 that odds ratios overestimate risk ratios when events are not rare.  
45  
46  
47  
48  
49

50 The total effects were estimated as 10.6% (95% CI: 3.8%, 17.2%) of PTBs attributable to  
51  
52 AT among pregnant women exposed to a day when AT was 24.9 °C vs. exposure on an 18.6 °C  
53  
54 day. Accounting for mediation of this effect by PM<sub>10</sub>, ozone, and NO<sub>2</sub> by using inverse odds  
55  
56  
57

1  
2  
3 weights, the direct effect of AT on preterm birth was decreased to 10.4% (95% CI: 2.2%,  
4 17.5%), although the difference between the two values was not statistically significant (indirect  
5 effect = 0.3%, 95% CI: -1.7%, 2.6%).  
6  
7  
8  
9

10 In examining the RERI from interactions between AT and maternal characteristics, black  
11 race was found to be protective, with an RERI significantly less than 0 (Table 4). The  
12 magnitudes of RERIs are not meaningful, but this result indicates that the association between  
13 high temperature and PTB is weaker among women of black race than non-black race. In  
14 contrast, RERIs for age 16-19 years, age > 30 years, low prenatal care and tobacco smoking were  
15 all significantly greater than 0, indicating that the association between PTB and high temperature  
16 is stronger among women with these characteristics.  
17  
18  
19  
20  
21  
22  
23  
24  
25

## 26 DISCUSSION

27  
28 The strong association between short-term temperature exposure and PTB in Detroit,  
29 Michigan was consistent with several other studies' observed associations between PTB or  
30 diminished gestational age and temperature exposures within the week prior to delivery at  
31 regionally high temperatures. Regions in which these associations have been found include  
32 Central Australia (8.3% at 40 °C daily maximum temperature)<sup>13</sup>, Northern California, USA  
33 (11.6% increase for a 5.6 °C increase in weekly average AT in the warm season)<sup>34</sup>, Alabama,  
34 USA (32.4% increase with two consecutive days of daily mean temperatures above the 98<sup>th</sup>  
35 percentile)<sup>39</sup>, Barcelona, Spain (5-day reduction in average gestational age with heat index above  
36 the 99<sup>th</sup> percentile)<sup>10</sup>, Rome, Italy (1.9% increase per 1 °C increase in maximum AT in the prior  
37 two days and 19% increase during heat waves)<sup>40</sup>, Brisbane, Australia (13%-100% increase  
38 during heat waves), in an aggregated sample of 12 U.S. cities (12-16% increase with 2.8 °C  
39 increase in prior week)<sup>14</sup>, in Southern China (7% increase with previous-week temperatures  
40  
41  
42  
43  
44  
45  
46  
47  
48  
49  
50  
51  
52  
53  
54  
55  
56  
57  
58  
59  
60

1  
2  
3 above 95<sup>th</sup> percentile)<sup>12</sup>, and in a multi-city USA sample (2% increased PTB risk with extreme  
4 heat in the prior 4 days) <sup>41</sup>.

5  
6  
7  
8 The precise biological mechanisms by which high ambient temperature might increase  
9 risk for PTB are unclear, although psychosocial stress<sup>7</sup> and dehydration pathways are plausible.<sup>7</sup>  
10 Stress increases the levels of cortisol and epinephrine, potentially leading to the secretion of  
11 placental corticotropin-releasing hormones (CRH). Placental CRH can then activate the fetal  
12 hypothalamic-pituitary-adrenal (HPA) axis, which could prompt the fetal expression of cortisol  
13 and dehydroepiandrosterone-sulfate (DHEA-S) and placental release of estriol and  
14 prostaglandins, potentially triggering PTB<sup>8</sup>. Dehydration due to high temperatures and sweating  
15 could also reduce blood flow to the uterus and induce a greater release of antidiuretic hormone  
16 and oxytocin, which could trigger labor onset<sup>9</sup>.

17  
18  
19  
20  
21  
22  
23  
24  
25  
26  
27  
28 One strength of our study may be a tighter correspondence between the true ambient  
29 temperatures experienced by our sample and the measured outdoor ambient AT given the low air  
30 conditioning prevalence in the Detroit area during the time period. Specifically, in 1993, the last  
31 year for which county-specific American Housing Survey data were available in the Detroit area,  
32 only 32% of Wayne County households had central air conditioning<sup>42</sup>. Furthermore, central air  
33 conditioning prevalence was low in this region despite a “hot-summer humid continental  
34 climate” Köppen Climate Classification<sup>43</sup>, allowing a fairly wide range of warm season AT  
35 exposure over which AT-PTB associations could be examined. In contrast, regions where  
36 associations between temperature and PTB were null in rigorously conducted daily time series  
37 studies included Brandenburg and Saxony, Germany<sup>20</sup> and London, UK<sup>19</sup>, which are in  
38 “temperate oceanic climates,” where all months have average temperatures below 22 °C <sup>43</sup>.  
39  
40  
41  
42  
43  
44  
45  
46  
47  
48  
49  
50  
51  
52  
53  
54 Additionally, Guo et al.<sup>12</sup> found an association between previous-week temperature and PTB  
55  
56  
57

1  
2  
3 only in the “hot” region of China, defined as having annual average temperatures 19 °C or  
4  
5 higher. Furthermore, in a survival analysis of previous-week temperature and PTB in 18  
6  
7 European cities, the pooled effect estimates were null, and no individual city results were  
8  
9 presented<sup>44</sup>. Again, with the exception of 4 cities, these European cities were all in cooler  
10  
11 climates where all months have average temperatures below 22 °C<sup>43</sup>. This suggests that in  
12  
13 regions where the threat of extremely high temperatures is rare, PTB is not triggered at warm  
14  
15 temperatures, regardless of relative temperature thresholds, even at the same absolute  
16  
17 temperatures at which heat-associated PTB is experienced in warmer climates. This could be due  
18  
19 to differences in emotional stress<sup>45</sup> or physiological stress responses to warm temperatures  
20  
21 between climates. Alternatively, the heterogeneity in effect estimates could be due to regional  
22  
23 differences in the misclassification of the true individually-experienced temperatures by outdoor  
24  
25 temperatures. Finally, in the 18-city European study, the PTB rate was only 5%, suggesting that  
26  
27 PTB etiologies may differ between Europe and the U.S., in which case the pregnancies in the  
28  
29 European cohorts could have been less susceptible physiologically to high temperature<sup>44</sup>. Other  
30  
31 strengths of our study include our consideration of near-surface solar radiation and weather  
32  
33 conditions as confounders of the total effects of AT, air pollutants as mediators rather than  
34  
35 confounders, and estimation of the direct effects of AT as distinct from those mediated by air  
36  
37 pollutants. By using an analysis technique that was “agnostic” to exposure-mediator interactions  
38  
39 and could accommodate multiple mediators<sup>35</sup>, we found that most if not all of the effect of AT on  
40  
41 PTB is direct, and not mediated by daily changes in air pollution concentrations. However, this  
42  
43 mediation analysis technique tends to over-estimate the confidence intervals around the indirect  
44  
45 effects<sup>35</sup>, which may account for our finding a null indirect effect of air pollutants on PTB when  
46  
47 previous research has in fact identified significant associations between short-term increases in  
48  
49  
50  
51  
52  
53  
54  
55  
56  
57



1  
2  
3 air pollution and PTB<sup>46</sup>. We may have also underestimated the air pollutant effects because we  
4 were only examining the indirect effects of AT through an air pollutant pathway rather than the  
5 total effects of air pollution and because we only considered PM<sub>10</sub> rather than PM<sub>2.5</sub>.  
6  
7

8  
9  
10 Another strength of our study is that we reported RERIs, rather than merely reporting  
11 statistical interactions in the models. In doing so, we provided evidence for synergistic effects of  
12 high temperature with the independent risk factors for PTB of prenatal care, smoking status, and  
13 age. Interestingly, in this majority-black population, the risk of PTB with high temperatures was  
14 actually lower among black mothers, after controlling for age, education, smoking status, and  
15 prenatal care.  
16  
17  
18  
19  
20  
21  
22

23  
24 Limitations include the fact that we were not able to distinguish between spontaneous  
25 and medically indicated PTBs. Considering that medically indicated preterm deliveries are  
26 unlikely to be related to temperature, this limitation affects the generalizability of our relative  
27 risks to populations where the relative percentages of spontaneous vs. medically indicated PTB  
28 differ. We also did not have information on how much earlier the birth was, e.g., a one-day  
29 premature birth vs. a six-week premature birth. This prevented us from including an offset for  
30 the population of pregnancies at-risk of PTB<sup>47</sup>. Our model included a spline for year and spline  
31 for day-of-year to attempt to capture within-season variations in PTBs. Varying the degrees of  
32 freedom in the day-of-year term from 2 to 8 had only a mild effect on the relative risks, although  
33 this would not have captured sub-weekly changes in PTBs. Another limitation is our dependence  
34 on last menstrual period rather than ultrasound-derived gestational age. Last menstrual period  
35 tends to result in more births being classified as preterm, particularly among Blacks<sup>48</sup>. This  
36 limitation, assuming it was not correlated with temperature, would bias our results towards the  
37 null.  
38  
39  
40  
41  
42  
43  
44  
45  
46  
47  
48  
49  
50  
51  
52  
53  
54  
55  
56  
57  
58  
59  
60

1  
2  
3 An additional limitation is that the prevalence of characteristics enhancing vulnerability  
4 to PTB may have changed since the study period, thereby decreasing the generalizability of these  
5 results to the present-day population of this region. Future research should employ present-day  
6 cohorts of pregnant women, for which a denominator of total pregnancies is therefore available,  
7 linked with refined temperature exposure measurements, including indoor and neighborhood  
8 temperature exposure estimates. These research refinements will better characterize the thermal  
9 exposures and severity of heat-induced PTB, or more specifically, gestational length, and better  
10 identify which pregnancies are particularly vulnerable to early parturition on hot days.  
11  
12  
13  
14  
15  
16  
17  
18  
19  
20  
21

22 Despite the aforementioned limitations, given the evidence from this and other studies,  
23 pregnant women, in addition to older adults, should be considered as a group vulnerable to short-  
24 term heat health effects when considering housing and climate adaptation measures in Detroit  
25 and similar or warmer climates.  
26  
27  
28  
29  
30  
31  
32  
33  
34  
35  
36  
37  
38  
39  
40  
41  
42  
43  
44  
45  
46  
47  
48  
49  
50  
51  
52  
53  
54  
55  
56  
57  
58  
59  
60

## CONTRIBUTORSHIP STATEMENT

MSO, SAB, HQL, RLW, and LC obtained the data or resources, critiqued the analysis, and reviewed the manuscript. RSB and KCC assisted with preliminary analyses, critiqued the analysis and reviewed the manuscript. AJY performed and drafted preliminary analyses and reviewed the manuscript. CJG directed preliminary analyses, revised the analysis, and revised the manuscript. We thank Leah Comment for early-stage data management and analysis assistance. We also thank Patricia Maina for her contribution to the preterm birth and heat literature review and Sung Kyun Park for early stage advice.

## FUNDING

This work was supported by a Michigan Institute for Clinical and Health Research Postdoctoral Translational Scholars Fellowship (2UL1TR000433-06), National Institute of Environmental Health Sciences grants K99ES026198 and P30ES017885, Cooperative Agreement Number EH001124 from the Centers for Disease Control and Prevention (CDC), National Science Foundation grant 1520803, and CDC/ National Institute for Occupational Safety and Health grant T42 OH008455. Its contents are solely the responsibility of the authors and do not necessarily represent the official views of the CDC or the Michigan Department of Health and Human Services. None of the funders participated in the design, collection, analysis, or interpretation of the data.

## COMPETING INTERESTS

None declared.

## DATA SHARING STATEMENT

Birth outcome data were derived from birth certificate records kept by the Michigan Department of Health and Human Services (MDHHS).<sup>4</sup> These confidential data may be obtained from the MDHHS Division for Vital Records and Health Statistics following completion of a data use agreement and IRB approval. The exposure data are publicly available and were obtained as described in the Methods. The processed exposure data may be requested from C. Gronlund (gronlund@umich.edu).

## REFERENCES

1. Centers for Disease Control and Prevention (CDC). Premature Birth 2017 [updated 11/6/2017]. Available from: <https://www.cdc.gov/features/prematurebirth/> accessed Jan 29 2018.
2. Make Your Date Detroit, Center for Advanced Obstetrical Care and Research, Wayne State University. Why This Matters--Facts 2017 [Available from: <https://makeyourdate.org/facts/> accessed Jan 29 2018.
3. Sun XL, Luo XP, Zhao CM, et al. The association between fine particulate matter exposure during pregnancy and preterm birth: a meta-analysis. *BMC Pregnancy Childbirth* 2015;15:12. doi: 10.1186/s12884-015-0738-2
4. Le HQ, Batterman SA, Wirth JJ, et al. Air pollutant exposure and preterm and term small-for-gestational-age births in Detroit, Michigan: Long-term trends and associations. *Environment International* 2012;44:7-17. doi: <http://dx.doi.org/10.1016/j.envint.2012.01.003>
5. Carolan-Olah M, Frankowska D. High environmental temperature and preterm birth: a review of the evidence. *Midwifery* 2014;30(1):50-9. doi: 10.1016/j.midw.2013.01.011 [published Online First: 2013/03/12]
6. Strand LB, Barnett AG, Tong S. The influence of season and ambient temperature on birth outcomes: a review of the epidemiological literature. *Environ Res* 2011;111(3):451-62. doi: 10.1016/j.envres.2011.01.023 [published Online First: 2011/02/22]
7. McMorris T, Swain J, Smith M, et al. Heat stress, plasma concentrations of adrenaline, noradrenaline, 5-hydroxytryptamine and cortisol, mood state and cognitive performance. *International Journal of Psychophysiology* 2006;61(2):204-15. doi: <https://doi.org/10.1016/j.ijpsycho.2005.10.002>
8. Behrman RE, Adashi EY, Allen MC, et al. Preterm Birth: Causes, Consequences, and Prevention. In: Medicine Io, ed. Report Brief. Washington, DC: Institute of Medicine, 2006.
9. Stan C, Boulvain M, Hirsbrunner-Amagbaly P, et al. Hydration for treatment of preterm labour. *Cochrane Database Syst Rev* 2002;2
10. Dadvand P, Basagana X, Sartini C, et al. Climate extremes and the length of gestation. *Environ Health Perspect* 2011;119(10):1449-53. doi: 10.1289/ehp.1003241 [published Online First: 2011/06/11]
11. Strand LB, Barnett AG, Tong S. Maternal exposure to ambient temperature and the risks of preterm birth and stillbirth in Brisbane, Australia. *Am J Epidemiol* 2012;175(2):99-107. doi: 10.1093/aje/kwr404 [published Online First: 2011/12/15]
12. Guo TJ, Wang YY, Zhang HG, et al. The association between ambient temperature and the risk of preterm birth in China. *Sci Total Environ* 2018;613:439-46. doi: 10.1016/j.scitotenv.2017.09.104
13. Mathew S, Mathur D, Chang AB, et al. Examining the Effects of Ambient Temperature on Pre-Term Birth in Central Australia. *International Journal of Environmental Research and Public Health* 2017;14(2) doi: 10.3390/ijerph14020147
14. Ha SD, Liu DP, Zhu YY, et al. Ambient Temperature and Early Delivery of Singleton Pregnancies. *Environmental Health Perspectives* 2017;125(3):453-59. doi: 10.1289/ehp97

15. Basu R, Chen H, Li DK, et al. The impact of maternal factors on the association between temperature and preterm delivery. *Environmental Research* 2017;154:109-14. doi: 10.1016/j.envres.2016.12.017
16. Schifano P, Asta F, Dadvand P, et al. Heat and air pollution exposure as triggers of delivery: A survival analysis of population-based pregnancy cohorts in Rome and Barcelona. *Environment International* 2016;88:153-59. doi: 10.1016/j.envint.2015.12.013
17. He JR, Liu Y, Xia XY, et al. Ambient Temperature and the Risk of Preterm Birth in Guangzhou, China (2001-2011). *Environ Health Perspect* 2015 doi: 10.1289/ehp.1509778 [published Online First: 2015/12/17]
18. Arroyo V, Diaz J, Ortiz C, et al. Short term effect of air pollution, noise and heat waves on preterm births in Madrid (Spain). *Environmental Research* 2016;145:162-68. doi: 10.1016/j.envres.2015.11.034
19. Lee SJ, Hajat S, Steer PJ, et al. A time-series analysis of any short-term effects of meteorological and air pollution factors on preterm births in London, UK. *Environ Res* 2008;106(2):185-94. doi: 10.1016/j.envres.2007.10.003 [published Online First: 2007/11/21]
20. Wolf J, Armstrong B. The association of season and temperature with adverse pregnancy outcome in two German states, a time-series analysis. *PLoS One* 2012;7(7):e40228. doi: 10.1371/journal.pone.0040228 [published Online First: 2012/07/14]
21. Porter KR, Thomas SD, Whitman S. The relation of gestation length to short-term heat stress. *American Journal of Public Health* 1999;89(7):1090-92. doi: 10.2105/ajph.89.7.1090
22. Buckley JP, Samet JM, Richardson DB. Commentary: Does air pollution confound studies of temperature? *Epidemiology* 2014;25(2):242-5. doi: 10.1097/ede.0000000000000051 [published Online First: 2014/02/04]
23. Yu X, Feric Z, Cordero JF, et al. Potential influence of temperature and precipitation on preterm birth rate in Puerto Rico. *Scientific reports* 2018;8:9. doi: 10.1038/s41598-018-34179-z
24. Dovnik A, Mujezinović F. The Association of Vitamin D Levels with Common Pregnancy Complications. *Nutrients* 2018;10(7):867. doi: 10.3390/nu10070867
25. Abel D, Holloway T, Kladar RM, et al. Response of Power Plant Emissions to Ambient Temperature in the Eastern United States. *Environ Sci Technol* 2017;51(10):5838-46. doi: 10.1021/acs.est.6b06201
26. Environmental Protection Agency (EPA). Ozone Pollution and Your Patient's Health: What is Ozone? 2018 [Available from: <https://www.epa.gov/ozone-pollution-and-your-patients-health/what-ozone> accessed December 20 2018.
27. National Climatic Data Center. Integrated Surface Database Lite 2010 [Available from: <http://www.ncdc.noaa.gov/oa/climate/isd/index.php> accessed July 2010.
28. Kalkstein LS, Valimont, K.M. An evaluation of summer discomfort in the United States using a relative climatological index. *Bull Am Meteorol Soc* 1986;7:842-48.
29. Oswald EM, Rood RB, Zhang K, et al. An investigation into the spatial variability of near-surface air temperatures in the Detroit, MI metropolitan region. *J Appl Meteorol Climatol* 2012;51(7):1290-304. doi: 10.1175/JAMC-D-11-0127.1
30. National Solar Radiation Database, 1991-2010 Update [Available from: [https://rredc.nrel.gov/solar/old\\_data/nsrdb/](https://rredc.nrel.gov/solar/old_data/nsrdb/) accessed August 25 2017.

- 1
- 2
- 3
- 4 31. Wilcox S. National Solar Radiation Database 1991-2010 Update: User's Manual. In: National
- 5 Renewable Energy Laboratory, ed.: U.S. Department of Energy, Office of Energy
- 6 Efficiency & Renewable Energy, 2012.
- 7 32. PRISM Climate Group. PRISM Climate Data 2016 [Available from:
- 8 <http://www.prism.oregonstate.edu/> accessed March 6 2016.
- 9 33. U.S. Environmental Protection Agency. AirData 2015 [Available from:
- 10 [http://aqsdrl.epa.gov/aqsweb/aqstmp/airdata/download\\_files.html](http://aqsdrl.epa.gov/aqsweb/aqstmp/airdata/download_files.html) accessed Feb 5 2015.
- 11 34. Avalos LA, Chen H, Li DK, et al. The impact of high apparent temperature on spontaneous
- 12 preterm delivery: a case-crossover study. *Environmental Health* 2017;16 doi:
- 13 10.1186/s12940-017-0209-5
- 14 35. Nguyen QC, Osypuk TL, Schmidt NM, et al. Practical Guidance for Conducting Mediation
- 15 Analysis With Multiple Mediators Using Inverse Odds Ratio Weighting. *American*
- 16 *Journal of Epidemiology* 2015;181(5):349-56. doi: 10.1093/aje/kwu278
- 17 36. Nie L, Chu H, Li F, et al. Relative Excess Risk Due to Interaction: Resampling-based
- 18 Confidence Intervals. *Epidemiology* 2010;21(4):552-56.
- 19 37. Gasparrini A, Armstrong B, Kenward MG. Distributed lag non-linear models. *Stat Med*
- 20 2010;29(21):2224-34. doi: 10.1002/sim.3940 [doi] [published Online First: 2010/09/03]
- 21 38. Venables WN, Ripley BD. Functions and Datasets to Support "Modern Applied Statistics
- 22 with S" (4th edition, 2002) 2018 [Available from: [https://cran.r-](https://cran.r-project.org/web/packages/MASS/index.html)
- 23 [project.org/web/packages/MASS/index.html](https://cran.r-project.org/web/packages/MASS/index.html) accessed April 1 2019.
- 24 39. Kent ST, McClure LA, Zaitchik BF, et al. Heat Waves and Health Outcomes in Alabama
- 25 (USA): The Importance of Heat Wave Definition. *Environ Health Perspect* 2013 doi:
- 26 10.1289/ehp.1307262 [published Online First: 2013/11/26]
- 27 40. Schifano P, Lallo A, Asta F, et al. Effect of ambient temperature and air pollutants on the risk
- 28 of preterm birth, Rome 2001-2010. *Environ Int* 2013;61:77-87. doi:
- 29 10.1016/j.envint.2013.09.005 [published Online First: 2013/10/10]
- 30 41. Sun SZ, Weinberger KR, Spangler KR, et al. Ambient temperature and preterm birth: A
- 31 retrospective study of 32 million US singleton births. *Environment International*
- 32 2019;126:7-13. doi: 10.1016/j.envint.2019.02.023
- 33 42. United States. Bureau of the Census. American Housing Survey, 1993: MSA Core and
- 34 Supplement File: [distributor], 2006.
- 35 43. Peel MC, Finlayson BL, McMahon TA. Updated world map of the Köppen-Geiger climate
- 36 classification. *Hydrol Earth Syst Sci* 2007;11(5):1633-44. doi: 10.5194/hess-11-1633-
- 37 2007
- 38 44. Giorgis-Allemand L, Pedersen M, Bernard C, et al. The Influence of Meteorological Factors
- 39 and Atmospheric Pollutants on the Risk of Preterm Birth. *American Journal of*
- 40 *Epidemiology* 2017;185(4):247-58. doi: 10.1093/aje/kww141
- 41 45. Lin YF, Hu WJ, Xu J, et al. Association between temperature and maternal stress during
- 42 pregnancy. *Environmental Research* 2017;158:421-30. doi: 10.1016/j.envres.2017.06.034
- 43 46. Stieb DM, Lavigne E, Chen L, et al. Air pollution in the week prior to delivery and preterm
- 44 birth in 24 Canadian cities: a time to event analysis. *Environ Health* 2019;18(1):1. doi:
- 45 10.1186/s12940-018-0440-8 [published Online First: 2019/01/05]
- 46 47. Vicedo-Cabrera AM, Iniguez C, Barona C, et al. Exposure to elevated temperatures and risk
- 47 of preterm birth in Valencia, Spain. *Environmental Research* 2014;134:210-17. doi:
- 48 10.1016/j.envres.2014.07.021
- 49
- 50
- 51
- 52
- 53
- 54
- 55
- 56
- 57
- 58
- 59
- 60

- 1  
2  
3 48. Wingate MS, Alexander GR, Buekens P, et al. Comparison of Gestational Age  
4 Classifications: Date of Last Menstrual Period vs. Clinical Estimate. *Annals of*  
5 *epidemiology* 2007;17(6):425-30. doi: <https://doi.org/10.1016/j.annepidem.2007.01.035>  
6  
7  
8  
9  
10  
11  
12  
13  
14  
15  
16  
17  
18  
19  
20  
21  
22  
23  
24  
25  
26  
27  
28  
29  
30  
31  
32  
33  
34  
35  
36  
37  
38  
39  
40  
41  
42  
43  
44  
45  
46  
47  
48  
49  
50  
51  
52  
53  
54  
55  
56  
57  
58  
59  
60

For peer review only



## TABLES

Table 1. Demographics of Preterm Births in Detroit, MI Study Area, May-September, 1991-2001.

|                               | N     | %    |
|-------------------------------|-------|------|
| Total                         | 9,053 | 100  |
| Month                         |       |      |
| May                           | 1,918 | 21.2 |
| June                          | 1,944 | 21.5 |
| July                          | 1,903 | 21.0 |
| August                        | 1,754 | 19.4 |
| September                     | 1,534 | 16.9 |
| Year (Two Equal Time Periods) |       |      |
| 1991-1995                     | 4,708 | 56.2 |
| 1996-2000                     | 3,670 | 43.8 |
| Maternal Race                 |       |      |
| White                         | 2,443 | 27.0 |
| Black                         | 6,433 | 71.1 |
| Other                         | 177   | 1.9  |
| Maternal Smoking Status       |       |      |
| Non-Smoker                    | 6,621 | 73.1 |
| Smoker                        | 2,345 | 25.9 |
| Missing                       | 87    | 1.0  |
| Level of Prenatal Care        |       |      |
| Prenatal Care                 | 5,037 | 55.6 |
| Late or No Prenatal Care      | 2,960 | 32.7 |
| Missing                       | 1,056 | 11.7 |
| Maternal Age                  |       |      |
| 16-19 years                   | 1,782 | 19.7 |
| 20-29 years                   | 4,821 | 53.2 |
| ≥ 30 years                    | 2,450 | 27.1 |
| Maternal Education            |       |      |
| Less than High School         | 3,485 | 38.5 |
| High School or Higher         | 5,451 | 60.2 |
| Missing                       | 117   | 1.3  |



Table 2. Daily Exposures Among the PTB Cases, Detroit, MI Area, May-September, 1991-2001.

|                                                                          | N     | Median | Mean  | Min  | Max   |
|--------------------------------------------------------------------------|-------|--------|-------|------|-------|
| Two-day mean apparent temperature, °C                                    | 9,053 | 18.6   | 18.0  | 3.1  | 28.0  |
| Two-day mean apparent temperature 18.6 °C and above                      | 9,053 | 0.1    | 1.5   | 0.0  | 9.4   |
| Mean solar radiation (W/m <sup>2</sup> )                                 | 9,053 | 226.4  | 217.7 | 38.1 | 352.8 |
| Total precipitation (mm) <sup>a</sup>                                    | 9,053 | 0.0    | 0.4   | 0.0  | 56.7  |
| Mean wind speed (m/s)                                                    | 9,053 | 3.6    | 3.6   | 0.1  | 8.0   |
| Maximum 8-hour average ozone (ppb)                                       | 9,039 | 43.0   | 44.8  | 3.2  | 102.0 |
| Mean particulate matter, 10 µm or less (µg/m <sup>3</sup> ) <sup>a</sup> | 8,331 | 39.0   | 38.5  | 8.0  | 158.0 |
| Mean nitrogen dioxide (ppb) <sup>a</sup>                                 | 8,956 | 18.4   | 19.7  | 0.0  | 72.8  |

<sup>a</sup> Geometric means are provided. Values were natural-log-transformed in the regression analyses.

Table 3. Relative Risk of Preterm Birth and Percent of Preterm Births Attributable to 2-day Mean Apparent Temperature (AT) on a 24.9 °C Day vs. an 18.6 °C Day, Detroit, MI Area, May-September, 1991-2001.

| Model | Knots in day-of-year spline | Covariates                                                                    | Relative Risk (95% Confidence Interval) | Percent attributable (95% Confidence Interval) |
|-------|-----------------------------|-------------------------------------------------------------------------------|-----------------------------------------|------------------------------------------------|
| 1     | 2                           | none                                                                          | 1.11 (1.02, 1.09)                       | 9.9 (2.4, 16.4)                                |
| 2     | 5                           | none                                                                          | 1.11 (1.03, 1.20)                       | 9.8 (2.6, 16.5)                                |
| 3     | 8                           | none                                                                          | 1.09 (1.01, 1.18)                       | 8.1 (1.0, 17.6)                                |
| 4     | 5                           | solar radiation, wind speed, precipitation                                    | 1.12 (1.04, 1.21)                       | 10.6 (3.8, 17.2)                               |
| 5     | 5                           | solar radiation, wind speed, precipitation, inverse-odds weights <sup>s</sup> | 1.12 (1.02, 1.21)                       | 10.4 (2.2, 17.5)                               |

<sup>s</sup>Inverse-odds weights calculated from the predicted odds of AT given lag day 0 and 1 of ozone, PM<sub>10</sub> and NO<sub>2</sub>.

Table 4. Relative Excess Risk Due to Interaction (RERI) for Interactions of 2-Day Mean Apparent Temperature (AT) on a 24.9 °C Day vs. an 18.6 °C Day with Maternal Characteristics, Detroit, MI Area, May-September, 1991-2001.

| Characteristic    | RERI | 95% Confidence Interval |
|-------------------|------|-------------------------|
| Black race        | -1.5 | -1.9, -1.0              |
| Age 16-19 years   | 0.50 | 0.22, 0.76              |
| Age > 30 years    | 0.34 | 0.08, 0.65              |
| Low prenatal care | 0.44 | 0.19, 0.65              |
| No high school    | 0.19 | -0.06, 0.43             |
| Smoker            | 0.52 | 0.29, 0.76              |

1. With 5 knots in the day-of-year spline.

## FIGURE LEGENDS

Figure 1. Directed Acyclic Graph of the Causal Framework for Mediation of the Association Between Apparent Temperature (AT) and Preterm Birth (PTB) by Air Pollutants.

Figure 2. Association Between Mean Apparent Temperature (AT) Over Lag Days 0-1 and Preterm Birth (PTB), modeling AT as a b-spline with 3 df.

For peer review only

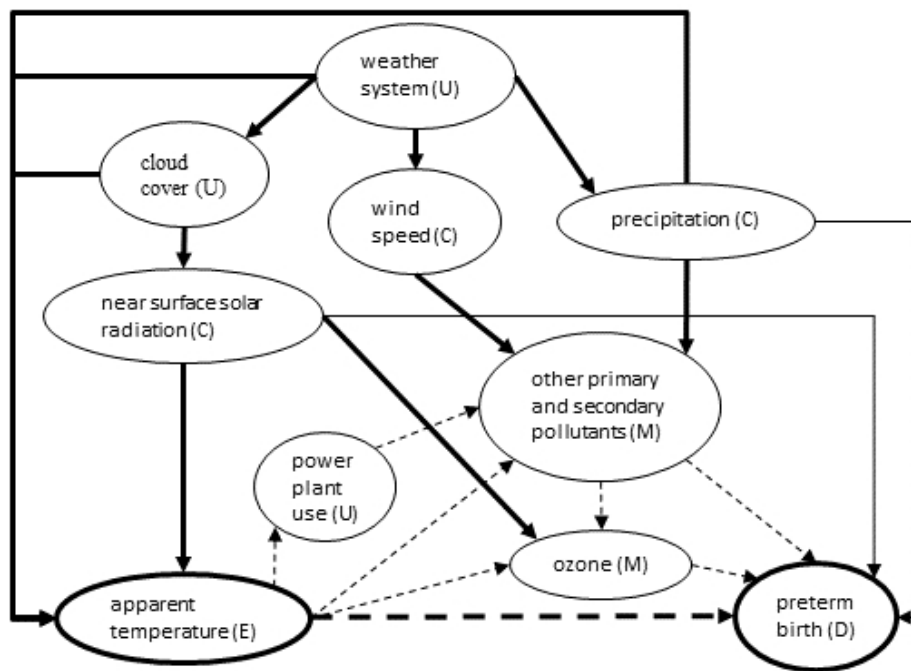

U = unmeasured, C = confounder, M = mediator, E = exposure of interest, D = outcome. Thick solid lines indicate known associations. Thin solid lines indicate suspected associations. The thick dashed line indicates the direct effect pathway being tested. The thin dashed lines indicate the indirect effect pathways being tested. Other primary and secondary pollutants include particulate matter less than 10 microns in aerodynamic diameter and nitrogen dioxide.

Figure 1. Directed Acyclic Graph of the Causal Framework for Mediation of the Association Between Apparent Temperature (AT) and Preterm Birth (PTB) by Air Pollutants.

1  
2  
3  
4  
5  
6  
7  
8  
9  
10  
11  
12  
13  
14  
15  
16  
17  
18  
19  
20  
21  
22  
23  
24  
25  
26  
27  
28  
29  
30  
31  
32  
33  
34  
35  
36  
37  
38  
39  
40  
41  
42  
43  
44  
45  
46  
47  
48  
49  
50  
51  
52  
53  
54  
55  
56  
57  
58  
59  
60

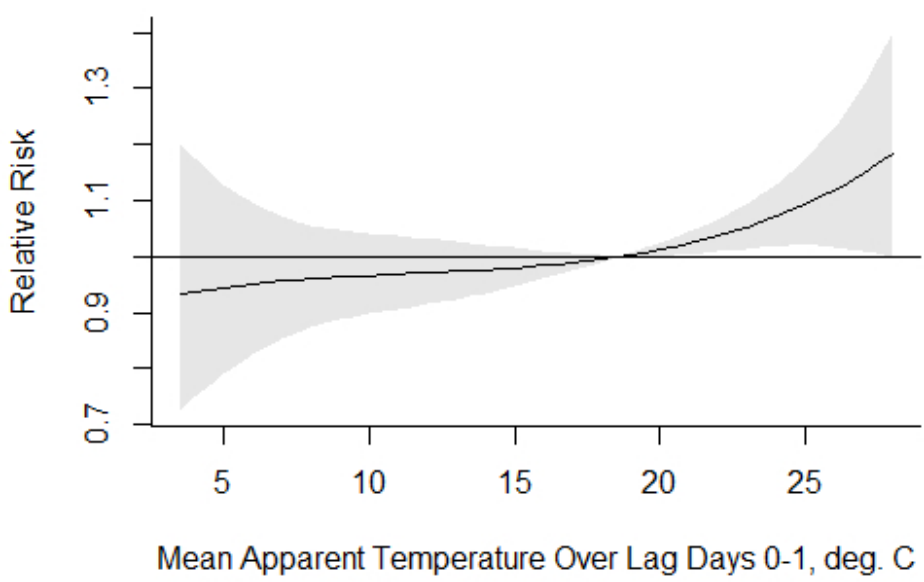

Figure 2. Association Between Mean Apparent Temperature (AT) Over Lag Days 0-1 and Preterm Birth (PTB), modeling AT as a b-spline with 3 df.

1  
2  
3 **SUPPLEMENTAL MATERIAL**  
4

5 Table S1. Percent of preterm births attributable to 2-day mean apparent temperature (AT) on a 24.9 °C  
6 day vs. an 18.6 °C day, Detroit, MI, May-September, 1991-2001, using a case-crossover design.

7  
8  
9  
10  
11  
12  
13  
14  
15  
16

| Model | Time stratum | Covariates                                                                    | Percent attributable | 95% Confidence Interval |
|-------|--------------|-------------------------------------------------------------------------------|----------------------|-------------------------|
| 1     | 3 weeks      | none                                                                          | 11.2                 | 6.1, 15.9               |
| 2     | 2 weeks      | none                                                                          | 11.7                 | 6.9, 16.3               |
| 3     | 1 month      | none                                                                          | 11.7                 | 6.8, 16.4               |
| 4     | 3 weeks      | solar radiation, wind speed, precipitation                                    | 18.7                 | 1.3, 31.5               |
| 5     | 3 weeks      | solar radiation, wind speed, precipitation, inverse-odds weights <sup>s</sup> | 11.1                 | 3.5, 17.5               |

17 <sup>s</sup>Inverse-odds weights calculated from the predicted odds of AT given lag day 0 and 1 of ozone, PM<sub>10</sub> and  
18 NO<sub>2</sub>.  
19  
20  
21  
22  
23  
24  
25  
26  
27  
28  
29  
30  
31  
32  
33  
34  
35  
36  
37  
38  
39  
40  
41  
42  
43  
44  
45  
46  
47  
48  
49  
50  
51  
52  
53  
54  
55  
56  
57  
58  
59  
60

# BMJ Open

## A time series analysis of total and direct associations between high temperatures and preterm births in Detroit, Michigan

|                                 |                                                                                                                                                                                                                                                                                                                                                                                                                                                                                                                                                                                                         |
|---------------------------------|---------------------------------------------------------------------------------------------------------------------------------------------------------------------------------------------------------------------------------------------------------------------------------------------------------------------------------------------------------------------------------------------------------------------------------------------------------------------------------------------------------------------------------------------------------------------------------------------------------|
| Journal:                        | <i>BMJ Open</i>                                                                                                                                                                                                                                                                                                                                                                                                                                                                                                                                                                                         |
| Manuscript ID                   | bmjopen-2019-032476.R2                                                                                                                                                                                                                                                                                                                                                                                                                                                                                                                                                                                  |
| Article Type:                   | Original research                                                                                                                                                                                                                                                                                                                                                                                                                                                                                                                                                                                       |
| Date Submitted by the Author:   | 17-Dec-2019                                                                                                                                                                                                                                                                                                                                                                                                                                                                                                                                                                                             |
| Complete List of Authors:       | Gronlund, Carina; University of Michigan Institute for Social Research, Survey Research Center<br>Yang, Alyssa; Urban Indian Health Institute<br>Conlon, Kathryn; University of California Davis<br>Bergmans, Rachel S.; University of Michigan Medical School,<br>Le, Hien; Chemours Co<br>Batterman, Stuart; University of Michigan, Environmental Health Sciences<br>Wahl, Robert; Michigan Department of Health and Human Services<br>Cameron, Lorraine; Michigan Department of Health and Human Services<br>O'Neill, Marie; University of Michigan, Environmental Health Sciences and Epidemiology |
| <b>Primary Subject Heading</b>: | Epidemiology                                                                                                                                                                                                                                                                                                                                                                                                                                                                                                                                                                                            |
| Secondary Subject Heading:      | Public health                                                                                                                                                                                                                                                                                                                                                                                                                                                                                                                                                                                           |
| Keywords:                       | Maternal medicine < OBSTETRICS, STATISTICS & RESEARCH METHODS, EPIDEMIOLOGY                                                                                                                                                                                                                                                                                                                                                                                                                                                                                                                             |
|                                 |                                                                                                                                                                                                                                                                                                                                                                                                                                                                                                                                                                                                         |

SCHOLARONE™  
Manuscripts



I, the Submitting Author has the right to grant and does grant on behalf of all authors of the Work (as defined in the below author licence), an exclusive licence and/or a non-exclusive licence for contributions from authors who are: i) UK Crown employees; ii) where BMJ has agreed a CC-BY licence shall apply, and/or iii) in accordance with the terms applicable for US Federal Government officers or employees acting as part of their official duties; on a worldwide, perpetual, irrevocable, royalty-free basis to BMJ Publishing Group Ltd ("BMJ") its licensees and where the relevant Journal is co-owned by BMJ to the co-owners of the Journal, to publish the Work in this journal and any other BMJ products and to exploit all rights, as set out in our [licence](#).

The Submitting Author accepts and understands that any supply made under these terms is made by BMJ to the Submitting Author unless you are acting as an employee on behalf of your employer or a postgraduate student of an affiliated institution which is paying any applicable article publishing charge ("APC") for Open Access articles. Where the Submitting Author wishes to make the Work available on an Open Access basis (and intends to pay the relevant APC), the terms of reuse of such Open Access shall be governed by a Creative Commons licence – details of these licences and which [Creative Commons](#) licence will apply to this Work are set out in our licence referred to above.

Other than as permitted in any relevant BMJ Author's Self Archiving Policies, I confirm this Work has not been accepted for publication elsewhere, is not being considered for publication elsewhere and does not duplicate material already published. I confirm all authors consent to publication of this Work and authorise the granting of this licence.

1  
2  
3 TITLE PAGE  
45 **Title**  
6

7 A time series analysis of total and direct associations between high temperatures and preterm  
8 births in Detroit, Michigan  
9

10 **Authors**  
11

12 Carina J. Gronlund<sup>1</sup>, Alyssa J. Yang<sup>2</sup>, Kathryn C. Conlon<sup>3</sup>, Rachel S. Bergmans<sup>4</sup>, Hien Q. Le<sup>5</sup>,  
13 Stuart A. Batterman<sup>6</sup>, Robert L. Wahl<sup>7</sup>, Lorraine Cameron<sup>7</sup>, Marie S. O'Neill<sup>6,8</sup>  
14  
15

16 <sup>1</sup>Corresponding author:

17 University of Michigan Institute for Social Research  
18 Survey Research Center, Social Environment and Health Program  
19 426 Thompson St. Rm 3340  
20 Ann Arbor, MI 48104  
21 [gronlund@umich.edu](mailto:gronlund@umich.edu)  
22 734-615-9215  
23  
24

25 <sup>2</sup>Urban Indian Health Institute, Seattle, WA, USA  
26

27 <sup>3</sup>University of California at Davis, Davis, CA, USA  
28

29 <sup>4</sup>Department of Psychiatry, University of Michigan, Ann Arbor, MI, USA  
30

31 <sup>5</sup>Health Services/Epidemiology, The Chemours Company, Wilmington, DE, USA  
32  
33

34 <sup>6</sup>Department of Environmental Health Sciences, University of Michigan, Ann Arbor, MI, USA  
35

36 <sup>7</sup>Michigan Department of Health and Human Services, Lansing, MI, USA  
37

38 <sup>8</sup>Department of Epidemiology, University of Michigan, Ann Arbor, MI, USA  
39  
40

41 Word count: 3,858  
42  
43  
44  
45  
46  
47  
48  
49  
50  
51  
52  
53  
54  
55  
56  
57  
58  
59  
60



## ABSTRACT

Objectives: Preterm births (PTBs) represent significant health risks, and several studies have found associations between high outdoor temperatures and PTB. We estimated both the total and natural direct effects (independent of particulate matter, ozone and nitrogen dioxide air pollutants) of the prior two-day mean apparent temperature (AT) on PTB. We evaluated effect modification by maternal age, race, education, smoking status, and prenatal care.

Design and Setting: We obtained birth records and meteorologic data for the Detroit, Michigan area for the warm months (May-September), 1991-2001. We used a time series Poisson regression with splines of AT, wind speed, solar radiation, and citywide average precipitation to estimate total effects. To accommodate multiple mediators and exposure-mediator interactions, AT inverse odds weights, predicted by meteorological and air pollutant covariates, were added in a subsequent model to estimate direct effects.

Results: At 24.9 °C relative to 18.6 °C, 10.6% (95% Confidence Interval: 3.8%, 17.2%) of PTBs were attributable to the total effects of AT, and 10.4% (95% CI: 2.2%, 17.5%) to direct effects.

Relative excess risks of interaction indicated that the risk of PTB with increasing temperature above 18.6 °C was significantly lower among black mothers and higher among mothers less than 19, older than 30, with late or no prenatal care, and who smoked.

Conclusion: This additional evidence of a direct association between high temperature and PTB may motivate public health interventions to reduce extreme heat exposures among pregnant women, particularly among those who may have enhanced vulnerability.

## STRENGTHS AND LIMITATIONS OF THIS STUDY

- We expand on a growing literature demonstrating total effects of temperature on PTB by examining mediation of the total temperature effect by air pollutants.
- We did not have geographic identifiers for the study participants at a level as fine as residential address or indoor exposure information, and we therefore assigned time-varying environmental exposures at an outdoor, citywide level.
- A low prevalence of residential air conditioning (32%) in the study time period suggests that our exposure assignment using outdoor exposures alone may have more accurately reflected total daily exposures than in more recent studies in other geographies.
- We account for multiple mediators and potential exposure-mediator interactions by applying a straightforward technique—the use of inverse odds weights—to separate the total effects of temperature on PTB from the direct effects.
- We used methods examining potential synergistic effects, as opposed to just examining statistical interactions, by other characteristics that confer vulnerability to PTB.

## INTRODUCTION

Preterm births (PTBs) are defined as births that occur before 37 gestational weeks. Babies born prematurely are at greater risk of infant death and impaired health, such as cerebral palsy and impairments of cognitive development, hearing, vision, respiration, and digestion. In 2016, 10% of babies were born prematurely, with statewide rates ranging 7.8-13.7%<sup>1</sup>. Within-state disparities in preterm birth rates can be greater: from 1990-2010, 18% of births in Detroit, Michigan were PTBs<sup>2</sup>.

Certain risk factors are known to be associated with PTB, such as cigarette smoking, alcohol use, hypertension, and diabetes<sup>1</sup>. Air pollution is associated with PTB<sup>3,4</sup>, and higher ambient temperature has been proposed as a risk factor for PTB<sup>5,6</sup>.

High ambient temperature could pose a risk for PTB through several biological pathways, including stress and dehydration pathways.<sup>7</sup> Several studies have evaluated possible associations between high ambient temperature and PTB, with mixed results<sup>5,6</sup>. Studies in cities in Australia, Quebec, China, Belgium, Italy, Spain and across the U.S. have all found significant positive associations between hot temperatures within the week preceding delivery and PTB<sup>5,6,8-16</sup>. High ambient temperatures in the month of conception and the third trimester were also positively associated with PTB in Changsha, China.<sup>17,18</sup> However, earlier, rigorously conducted time series analyses of temperature and PTB in Germany and in London, England did not find associations<sup>19,20</sup>. Likewise, in Chicago, Illinois, Porter et al. found no effect of the July 1995 heat wave on gestational length<sup>21</sup>. Sources of heterogeneity among these effect estimates may include differences in study design, prevailing climate and regional adaptation, population structure, exposure assessment, critical windows of exposure considered, and methods of gestational age assessment<sup>12</sup>.

1  
2  
3 Studies often control for air pollution exposure, although the argument has been made  
4 that treating air pollutants as confounders of temperature-health associations is inappropriate  
5 given that high temperatures can contribute to increased concentrations of some air pollutants,  
6 and both temperature and air pollution are affected by sunlight<sup>22</sup>. Differences in the manner in  
7 which air pollutants are accounted for in the temperature-PTB modeling may also account for  
8 some of the heterogeneity observed in this literature.  
9  
10  
11  
12  
13  
14  
15

16  
17 We performed a time series analysis to investigate the association between high AT and  
18 PTB in the Detroit, Michigan area, estimating both the total effects of temperature as well as the  
19 natural direct effects. To estimate natural direct effects, we excluded potential mediation effects  
20 by the air pollutants ozone, particulate matter with an aerodynamic diameter of less than 10  
21 micrometers (PM<sub>10</sub>), and nitrogen dioxide (NO<sub>2</sub>) using an inverse odds weighting technique. We  
22 further examined whether the maternal risk factors of age, race, education, smoking, and level of  
23 prenatal care modified the association between high AT and PTB.  
24  
25  
26  
27  
28  
29  
30  
31

## 32 33 METHODS

### 34 35 **Outcome Variable**

36  
37 Birth outcome data were derived from an electronic database of birth certificate records  
38 requested from the Michigan Department of Health and Human Services Division for Vital  
39 Records and Health Statistics and subsequently limited to live, singleton births that occurred  
40 from January 1, 1991 to December 31, 2001 in ZIP codes within 4 km of one of three air quality  
41 monitors (Allen Park, Linwood, and East 7 Mile) in and bordering Detroit, Michigan<sup>4</sup>. In the  
42 final data set, births were categorized as term vs. PTB, defined as births that were less than 37  
43 gestational weeks. We limited the data set to births that occurred May-September, in order to  
44 focus on heat exposures, for a total of 9,053 births  
45  
46  
47  
48  
49  
50  
51  
52  
53  
54

### 55 56 **Identification of Confounders and Mediators**

1  
2  
3 A directed acyclic graph (DAG) was constructed to define the causal framework and  
4 elucidate potential mediating effects of air pollutants in the association between AT and PTB  
5 (Figure 1). In this DAG, AT is the exposure of interest and PTB the outcome of interest. Given  
6 suspected associations between PTB and precipitation<sup>23</sup> and between PTB and vitamin D, for  
7 which one source is solar radiation<sup>24</sup>, as well as causal meteorological relationships between AT,  
8 solar radiation, and precipitation via a parent weather system, precipitation and solar radiation  
9 are potential confounders of the AT-PTB association. In this DAG, primary and secondary air  
10 pollutants are the hypothesized mediators of the temperature-PTB association given that: 1) they  
11 have been associated with the health outcome in other locations<sup>3</sup> and in this dataset in the third  
12 trimester<sup>4</sup>, 2) high temperature enhances the rate of ground-level ozone formation, and 3) power  
13 plant emissions increase when temperatures rise to accommodate additional demand for air  
14 conditioning<sup>25</sup>. Furthermore, the weather system is a causal parent to both AT and the pollutants  
15 and therefore a potential confounder given that meteorological conditions such as wind speed,  
16 precipitation, and cloud cover can affect pollutant formation and exposure as well as sunlight,  
17 which increases AT and promotes ozone formation<sup>26</sup>. Therefore, a model characterizing the *total*  
18 *effect* of AT would need to include the confounders of solar radiation, wind speed, and  
19 precipitation but not include pollutants. A model characterizing the *direct effect* of AT,  
20 independent of air pollution mediation, would need to include these mediators. The modeling  
21 used to characterize direct and indirect effects is further described in the Statistical Analysis  
22 section below.

### 23 **Exposure Variables**

24 Daily mean temperature, dew point temperature, and wind speed were obtained from the  
25 National Center for Environmental Information Integrated Surface Daily Lite database of daily  
26 weather parameters from weather stations worldwide.<sup>27</sup> Data from the Detroit City Airport was  
27

1  
2  
3 used due to its proximity to the mothers' ZIP codes of residence. To better represent thermal  
4  
5 discomfort, we used apparent temperature (AT) rather than air temperature. AT is similar to heat  
6  
7 index, and increases with both air temperature and relative humidity. AT was calculated using  
8  
9 the following formula:  $[-2.653 + (0.994 * \text{Temperature in } ^\circ\text{C}) + 0.0153 * (\text{Dew Point Temperature}$   
10  
11  $\text{in } ^\circ\text{C})^2]$ <sup>28,29</sup> From Detroit City Airport, 11% and 15% of temperatures and dew points were  
12  
13 missing, respectively, so data from Detroit Metropolitan Airport were used to replace these  
14  
15 missing data. Among non-missing values, daily AT from Detroit City Airport was highly  
16  
17 correlated with that from Detroit Metropolitan Airport (Pearson's correlation coefficient = 0.98).  
18  
19

20  
21 The total amount of direct and diffuse solar radiation received on a horizontal surface  
22  
23 during each 60-minute period at the Detroit City Airport was retrieved from the National Solar  
24  
25 Radiation Database<sup>30</sup>. These data were modeled from meteorological data including cloud cover,  
26  
27 aerosol, and ozone data from sources such as sun photometers, satellites and albedo data<sup>31</sup>. We  
28  
29 further estimated daily means from the hourly solar radiation values.  
30  
31

32  
33 Daily precipitation totals were obtained from Oregon State University's PRISM Climate  
34  
35 Group<sup>32</sup>. These are modeled at a 4-km resolution based on observations and a climatologically-  
36  
37 aided interpolation process. Rasters were cropped to the City of Detroit and daily citywide  
38  
39 averages were calculated.  
40  
41

42  
43 Daily eight-hour maximum ozone and daily mean NO<sub>2</sub> and PM<sub>10</sub> concentrations were  
44  
45 obtained from the Environmental Protection Agency for all Wayne County, Michigan monitors  
46  
47 and averaged by day and pollutant<sup>33</sup>. Only daily monitor values for which at least a single daily  
48  
49 or 18 of the 24-hourly values were available were retained, resulting in substantial missingness,  
50  
51 which was addressed in the statistical analysis below.  
52  
53  
54  
55  
56  
57

1  
2  
3 Birth certificate data also included date of birth and maternal age group (16-19, 20-29,  
4 and over 30), race (black or white), smoking status (smoker vs. non-smoker), education level  
5 (less than high school vs. high school or higher), and level of prenatal care (prenatal care vs. late  
6 or no prenatal care), which were used in analyses of effect modification.  
7  
8  
9

### 10 11 12 **Ethics Review**

13  
14 The Michigan Department of Health and Human Services Institutional Review Board (study  
15 number 201302-03-XA) and the University of Michigan Institutional Review Board (study  
16 number HUM00071694) determined the study exempt from IRB review per Title 45 Code of  
17 Federal Regulations 46.101.(b)--research involving collection of existing data and information is  
18 recorded by the investigator in such a manner that subjects cannot be identified.  
19  
20  
21  
22  
23  
24

### 25 26 **Patient and Public Involvement**

27 Patients and the public were not involved in the design or planning of the study.  
28  
29

### 30 31 **Statistical Analysis**

32 Case-crossover analysis is commonly used in studies of PTB and temperature<sup>12 13 34</sup>.  
33  
34 Because PTB is not a rare event in this particular population, the case-crossover odds ratios  
35 would not approximate risk ratios. Therefore, we used a time series design with Poisson  
36 regression, controlling for seasonal and long-term variations in PTB counts with a cubic b-spline  
37 for day-of-year, with 5, 2 or 8 knots, and a cubic b-spline for year with 2 knots. AT exposure was  
38 characterized as two-day mean AT, or the mean of the AT values on the day of and the day  
39 before birth. For AT and the covariates, non-linearity was considered by initially modeling each  
40 as a b-spline with three knots and selecting a single knot for subsequent modeling of the  
41 covariate as a piecewise linear spline when substantial nonlinearity was visually evident. The  
42 95% confidence intervals (CIs) were constructed from the 2.5<sup>th</sup> and 97.5<sup>th</sup> percentiles of 500  
43 bootstrapped samples. In sensitivity analyses, given its wide usage for this research question, a  
44  
45  
46  
47  
48  
49  
50  
51  
52  
53  
54  
55  
56  
57

1  
2  
3 time-stratified case-crossover design was used with time-strata defined as two- or three-week  
4  
5 periods.  
6

7  
8 To account for missing air pollutant values, we conducted multiple imputations using  
9  
10 chained equations. We used a more general model including lag days 0-2 of the above  
11  
12 meteorological and pollutant values. The air pollutant values were well-predicted by lag days 0-2  
13  
14 meteorology and air pollution values, and from examinations of trace plots, or scatter plots of  
15  
16 successive parameter estimates, we determined that a total of three imputations following two  
17  
18 burn-ins was sufficient. All subsequent analyses were conducted on each of the three resulting  
19  
20 data sets.  
21  
22

23  
24 To estimate the total effects of AT, we included terms for solar radiation, wind speed, and  
25  
26 precipitation in the Poisson model, which blocked all of the paths in the DAG from AT to PTB  
27  
28 that did not pass through the mediators (Figure 1). However, to estimate natural direct effects, we  
29  
30 used a more generalizable technique—inverse odds weighting—given that we had multiple  
31  
32 mediators and as well as potential exposure-mediator interactions<sup>35</sup>. In this technique, we first fit  
33  
34 a standard linear regression of two-day mean AT (meanAT01) on the air pollutant mediators and  
35  
36 covariates (solar radiation, wind speed, precipitation). We then estimated:  
37  
38

$$\text{inverse odds} = 1 / \exp(\text{predicted meanAT01} / \sigma^2) \quad \text{Equation 1}$$

39  
40  
41 where  $\sigma^2$  was the model mean squared-error. The inverse odds were then used as weights in the  
42  
43 subsequent analysis of PTB and AT with the other covariates but not the air pollutants. The  
44  
45 weights render AT independent of the mediators, thereby allowing the estimation of AT  
46  
47 separately from the effects of the air pollutant mediators on PTB. Total and direct effects were  
48  
49 calculated from each of the three imputed data sets and then each averaged.  
50  
51  
52  
53  
54  
55  
56  
57



To assess the public health impact of AT on PTB, we estimated the attributable fraction (AF), or the percent of PTB attributable to high AT among women exposed to the high AT. The AF was estimated as:  $1 / (1 - RR) * 100\%$  where the RR was for the 95<sup>th</sup> percentile (24.9 °C) relative to the 50<sup>th</sup> percentile (18.6 °C) of May-September two-day mean AT. Indirect effects were estimated as the difference between the total effects and the direct effects. The 95% confidence intervals (CIs) were constructed from the 2.5<sup>th</sup> and 97.5<sup>th</sup> percentiles of 500 bootstrapped samples.

To understand how the effects varied among maternal subgroups, or effect modification of the PTB-AT association, we simultaneously included interaction terms between the AT spline and the indicator variables for black race, age 16-19, age 30 years or older, low prenatal care (late or no prenatal care), current smoker, and no high school education. We expanded the data set such that we had rows for each unique combination of date and daily exposures, race, age group, education, prenatal care, and smoking status. Given the large number of zero counts, we specified a negative binomial distribution rather than a Poisson distribution. For public health significance, we were interested in the absolute rather than the relative increase in PTB risk due to synergistic effects between temperature and each modifier of interest. Therefore we focused on *additive*, rather than *multiplicative*, interactions. Relative excess risk due to interaction (RERI)<sup>36</sup> was calculated for each potential modifier as:

$$RR_{AT=95th,EM=1} - RR_{AT=95th,EM=0} - RR_{AT=50th,EM=1} + 1 \quad \text{Equation 2}$$

where EM was the effect modifier of interest and the denominator of each RR was the risk at the 50<sup>th</sup> percentile of AT (18.6 °C) and the absence of the modifier (EM = 0). RERI confidence CIs were bootstrapped from 1,000 samples. Analyses were conducted in SAS 9.4 (Copyright 2016, SAS Institute Inc., Cary, NC, USA) using PROC GLIMMIX, which allows for multiple splines

1  
2  
3 in a Poisson regression. Figure 2 was constructed in R (R Foundation for Statistical Computing,  
4 Vienna, Austria) using the dlnm package<sup>37</sup> following modeling using the glm.nb function in the  
5 MASS package<sup>38</sup>.  
6  
7  
8

## 9 10 RESULTS

11  
12 There were 9,053 singleton PTBs in this Detroit-area sample, May-September, 1991-  
13 2001 (Table 1). There were fewer PTBs in September compared to the other months, and  
14 consistent with Detroit's population decline, the number of PTBs declined with time.  
15  
16 Considering individual characteristics, 27.0% of the PTBs were among white mothers and 71.1%  
17 were among black mothers. A majority of the mothers were non-smokers (73.1%), had prenatal  
18 care (55.6%), were 20-29 years of age (53.2%) and had at least a high school education (60.2%)  
19 (Table 1).  
20  
21  
22  
23  
24  
25  
26

27  
28 On average, AT exposure was 18.0 °C, and among the days when AT was greater than  
29 the time-period-specific daily median of 18.6 °C (i.e., for the upper end of the temperature  
30 spline), AT averaged 1.5 °C higher. A total of 53% of the cases occurred on days with no rain, so  
31 the geometric mean precipitation was 0.4 mm. The mean ozone concentration was 44.8 ppb and  
32 the maximum was 102 ppb (Table 2). In examining the daily time series of ozone over the study  
33 period, the three-year running averages of the fourth highest daily 8-hour maximum value of  
34 ozone ranged from 77 to 92 ppb, suggesting that the (current) National Ambient Air Quality  
35 Standards (70 ppb) had been exceeded in each year of the study.  
36  
37  
38  
39  
40  
41  
42  
43  
44  
45

46  
47 In a crude model of the association between PTB and AT where AT was modeled  
48 flexibly as a b-spline with 3 df, we found a nonlinear association, with approximately null effects  
49 below 18-19 C and an increasingly stronger positive association at higher temperatures (Figure  
50 2). To address potential sensitivity of the results to control for season, we varied the df in the  
51  
52  
53  
54  
55  
56  
57

1  
2  
3 day-of-year term, using 2, 5, and 8 df. The results were not highly sensitive to this choice, with  
4  
5 the point estimates of the percentages of PTB attributable to AT ranging only from 8.1% (8 df) to  
6  
7 9.9% (2 df) among pregnant women exposed to days when AT was 24.9 °C vs exposure on 18.6  
8  
9 °C days (Table 3). In case-crossover analyses, the resulting odds ratios were also statistically  
10  
11 significantly greater than 1.0, regardless of whether the time strata were two-week, three-week,  
12  
13 or one-month periods (Supplemental Material Table S1). However, the odds ratios were greater  
14  
15 in magnitude than the risk ratios estimated in the time series design, which is expected, given  
16  
17 that odds ratios overestimate risk ratios when events are not rare.  
18  
19  
20

21  
22 The total effects were estimated as 10.6% (95% CI: 3.8%, 17.2%) of PTBs attributable to  
23  
24 AT among pregnant women exposed to a day when AT was 24.9 °C vs. exposure on an 18.6 °C  
25  
26 day. Accounting for mediation of this effect by PM<sub>10</sub>, ozone, and NO<sub>2</sub> by using inverse odds  
27  
28 weights, the direct effect of AT on preterm birth was decreased to 10.4% (95% CI: 2.2%,  
29  
30 17.5%), although the difference between the two values was not statistically significant (indirect  
31  
32 effect = 0.3%, 95% CI: -1.7%, 2.6%).  
33  
34  
35

36 In examining the RERI from interactions between AT and maternal characteristics, black  
37  
38 race was found to be protective, with an RERI significantly less than 0 (Table 4). The  
39  
40 magnitudes of RERIs are not meaningful, but this result indicates that the association between  
41  
42 high temperature and PTB is weaker among women of black race than non-black race. In  
43  
44 contrast, RERIs for age 16-19 years, age > 30 years, low prenatal care and tobacco smoking were  
45  
46 all significantly greater than 0, indicating that the association between PTB and high temperature  
47  
48 is stronger among women with these characteristics.  
49  
50

## 51 DISCUSSION

52  
53  
54  
55  
56  
57

1  
2  
3 The strong association between short-term temperature exposure and PTB in Detroit,  
4 Michigan was consistent with several other studies' observed associations between PTB or  
5 diminished gestational age and temperature exposures within the week prior to delivery at  
6 regionally high temperatures. Regions in which these associations have been found include  
7 Central Australia (8.3% at 40 °C daily maximum temperature)<sup>11</sup>, Northern California, USA  
8 (11.6% increase for a 5.6 °C increase in weekly average AT in the warm season)<sup>34</sup>, Alabama,  
9 USA (32.4% increase with two consecutive days of daily mean temperatures above the 98<sup>th</sup>  
10 percentile)<sup>39</sup>, Barcelona, Spain (5-day reduction in average gestational age with heat index above  
11 the 99<sup>th</sup> percentile)<sup>8</sup>, Rome, Italy (1.9% increase per 1 °C increase in maximum AT in the prior  
12 two days and 19% increase during heat waves)<sup>40</sup>, Brisbane, Australia (13%-100% increase  
13 during heat waves), in an aggregated sample of 12 U.S. cities (12-16% increase with 2.8 °C  
14 increase in prior week)<sup>12</sup>, in Southern China (7% increase with previous-week temperatures  
15 above 95<sup>th</sup> percentile)<sup>10</sup>, and in a multi-city USA sample (2% increased PTB risk with extreme  
16 heat in the prior 4 days)<sup>41</sup>.

17  
18 The precise biological mechanisms by which high ambient temperature might increase  
19 risk for PTB are unclear, although psychosocial stress<sup>7</sup> and dehydration pathways are plausible.<sup>7</sup>  
20 Stress increases the levels of cortisol and epinephrine, potentially leading to the secretion of  
21 placental corticotropin-releasing hormones (CRH). Placental CRH can then activate the fetal  
22 hypothalamic-pituitary-adrenal (HPA) axis, which could prompt the fetal expression of cortisol  
23 and dehydroepiandrosterone-sulfate (DHEA-S) and placental release of estriol and  
24 prostaglandins, potentially triggering PTB<sup>42</sup>. Dehydration due to high temperatures and sweating  
25 could also reduce blood flow to the uterus and induce a greater release of antidiuretic hormone  
26 and oxytocin, which could trigger labor onset<sup>43</sup>.

1  
2  
3 One strength of our study may be a tighter correspondence between the true ambient  
4 temperatures experienced by our sample and the measured outdoor ambient AT given the low air  
5 conditioning prevalence in the Detroit area during the time period. Specifically, in 1993, the last  
6 year for which county-specific American Housing Survey data were available in the Detroit area,  
7 only 32% of Wayne County households had central air conditioning<sup>44</sup>. Furthermore, central air  
8 conditioning prevalence was low in this region despite a “hot-summer humid continental  
9 climate” Köppen Climate Classification<sup>45</sup>, allowing a fairly wide range of warm season AT  
10 exposure over which AT-PTB associations could be examined. In contrast, regions where  
11 associations between temperature and PTB were null in rigorously conducted daily time series  
12 studies included Brandenburg and Saxony, Germany<sup>20</sup> and London, UK<sup>19</sup>, which are in  
13 “temperate oceanic climates,” where all months have average temperatures below 22 °C<sup>45</sup>.  
14 Additionally, Guo et al.<sup>10</sup> found an association between previous-week temperature and PTB  
15 only in the “hot” region of China, defined as having annual average temperatures 19 °C or  
16 higher. Furthermore, in a survival analysis of previous-week temperature and PTB in 18  
17 European cities, the pooled effect estimates were null, and no individual city results were  
18 presented<sup>46</sup>. Again, with the exception of 4 cities, these European cities were all in cooler  
19 climates where all months have average temperatures below 22 °C<sup>45</sup>. This suggests that in  
20 regions where the threat of extremely high temperatures is rare, PTB is not triggered at warm  
21 temperatures, regardless of relative temperature thresholds, even at the same absolute  
22 temperatures at which heat-associated PTB is experienced in warmer climates. This could be due  
23 to differences in emotional stress<sup>47</sup> or physiological stress responses to warm temperatures  
24 between climates. Alternatively, the heterogeneity in effect estimates could be due to regional  
25 differences in the misclassification of the true individually-experienced temperatures by outdoor  
26  
27  
28  
29  
30  
31  
32  
33  
34  
35  
36  
37  
38  
39  
40  
41  
42  
43  
44  
45  
46  
47  
48  
49  
50  
51  
52  
53  
54  
55  
56  
57

1  
2  
3 temperatures. Finally, in the 18-city European study, the PTB rate was only 5%, suggesting that  
4  
5 PTB etiologies may differ between Europe and the U.S., in which case the pregnancies in the  
6  
7 European cohorts could have been less susceptible physiologically to high temperature<sup>46</sup>. Other  
8  
9 strengths of our study include our consideration of near-surface solar radiation and weather  
10  
11 conditions as confounders of the total effects of AT, air pollutants as mediators rather than  
12  
13 confounders, and estimation of the direct effects of AT as distinct from those mediated by air  
14  
15 pollutants. By using an analysis technique that was “agnostic” to exposure-mediator interactions  
16  
17 and could accommodate multiple mediators<sup>35</sup>, we found that most if not all of the effect of AT on  
18  
19 PTB is direct, and not mediated by daily changes in air pollution concentrations. However, this  
20  
21 mediation analysis technique tends to over-estimate the confidence intervals around the indirect  
22  
23 effects<sup>35</sup>, which may account for our finding a null indirect effect of air pollutants on PTB when  
24  
25 previous research has in fact identified significant associations between short-term increases in  
26  
27 air pollution and PTB<sup>48</sup>. We may have also underestimated the air pollutant effects because we  
28  
29 were only examining the indirect effects of AT through an air pollutant pathway rather than the  
30  
31 total effects of air pollution and because we only considered PM<sub>10</sub> rather than PM<sub>2.5</sub>.  
32  
33  
34  
35  
36

37  
38 Another strength of our study is that we reported RERIs, rather than merely reporting  
39  
40 statistical interactions in the models. In doing so, we provided evidence for synergistic effects of  
41  
42 high temperature with the independent risk factors for PTB of prenatal care, smoking status, and  
43  
44 age. Interestingly, in this majority-black population, the risk of PTB with high temperatures was  
45  
46 actually lower among black mothers, after controlling for age, education, smoking status, and  
47  
48 prenatal care.  
49  
50

51  
52 Limitations include the fact that we were not able to distinguish between spontaneous  
53  
54 and medically indicated PTBs. Considering that medically indicated preterm deliveries are  
55  
56  
57

1  
2  
3 unlikely to be related to temperature, this limitation affects the generalizability of our relative  
4 risks to populations where the relative percentages of spontaneous vs. medically indicated PTB  
5 differ. We also did not have information on how much earlier the birth was, e.g., a one-day  
6 premature birth vs. a six-week premature birth. This prevented us from including an offset for  
7 the population of pregnancies at-risk of PTB<sup>49</sup>. Our model included a spline for year and spline  
8 for day-of-year to attempt to capture within-season variations in PTBs. Varying the degrees of  
9 freedom in the day-of-year term from 2 to 8 had only a mild effect on the relative risks, although  
10 this would not have captured sub-weekly changes in PTBs. Another limitation is our dependence  
11 on last menstrual period rather than ultrasound-derived gestational age. Last menstrual period  
12 tends to result in more births being classified as preterm, particularly among African  
13 Americans<sup>50</sup>. This limitation, assuming it was not correlated with temperature, would bias our  
14 results towards the null.  
15  
16  
17  
18  
19  
20  
21  
22  
23  
24  
25  
26  
27  
28  
29

30  
31 An additional limitation is that the prevalence of characteristics enhancing vulnerability  
32 to PTB may have changed since the study period, thereby decreasing the generalizability of these  
33 results to the present-day population of this region. Future research should employ present-day  
34 cohorts of pregnant women, for which a denominator of total pregnancies is therefore available,  
35 linked with refined temperature exposure measurements, including indoor and neighborhood  
36 temperature exposure estimates. These research refinements will better characterize the thermal  
37 exposures and severity of heat-induced PTB, or more specifically, gestational length, and better  
38 identify which pregnancies are particularly vulnerable to early parturition on hot days.  
39  
40  
41  
42  
43  
44  
45  
46  
47  
48

49 Despite the aforementioned limitations, given the evidence from this and other studies,  
50 pregnant women, in addition to older adults, should be considered as a group vulnerable to short-  
51  
52  
53  
54  
55  
56  
57

1  
2  
3 term heat health effects when considering housing and climate adaptation measures in Detroit  
4  
5 and similar or warmer climates.  
6  
7  
8  
9  
10  
11  
12  
13  
14  
15  
16  
17  
18  
19  
20  
21  
22  
23  
24  
25  
26  
27  
28  
29  
30  
31  
32  
33  
34  
35  
36  
37  
38  
39  
40  
41  
42  
43  
44  
45  
46  
47  
48  
49  
50  
51  
52  
53  
54  
55  
56  
57  
58  
59  
60

For peer review only



## CONTRIBUTORSHIP STATEMENT

MSO, SAB, HQL, RLW, and LC obtained the data or resources, critiqued the analysis, and reviewed the manuscript. RSB and KCC assisted with preliminary analyses, critiqued the analysis and reviewed the manuscript. AJY performed and drafted preliminary analyses and reviewed the manuscript. CJG directed preliminary analyses, revised the analysis, and revised the manuscript. We thank Leah Comment for early-stage data management and analysis assistance. We also thank Patricia Maina for her contribution to the preterm birth and heat literature review and Sung Kyun Park for early stage advice.

## FUNDING

This work was supported by a Michigan Institute for Clinical and Health Research Postdoctoral Translational Scholars Fellowship (2UL1TR000433-06), National Institute of Environmental Health Sciences grants K99ES026198 and P30ES017885, Cooperative Agreement Number EH001124 from the Centers for Disease Control and Prevention (CDC), National Science Foundation grant 1520803, and CDC/ National Institute for Occupational Safety and Health grant T42 OH008455. Its contents are solely the responsibility of the authors and do not necessarily represent the official views of the CDC or the Michigan Department of Health and Human Services. None of the funders participated in the design, collection, analysis, or interpretation of the data.

## COMPETING INTERESTS

None declared.

## DATA SHARING STATEMENT

Birth outcome data were derived from birth certificate records kept by the Michigan Department of Health and Human Services (MDHHS).<sup>4</sup> These confidential data may be obtained from the MDHHS Division for Vital Records and Health Statistics following completion of a data use agreement and IRB approval. The exposure data are publicly available and were obtained as described in the Methods. The processed exposure data may be requested from C. Gronlund (gronlund@umich.edu).

## REFERENCES

1. Centers for Disease Control and Prevention (CDC). Premature Birth 2017 [updated 11/6/2017]. Available from: <https://www.cdc.gov/features/prematurebirth/> accessed Jan 29 2018.
2. Make Your Date Detroit, Center for Advanced Obstetrical Care and Research, Wayne State University. Why This Matters--Facts 2017 [Available from: <https://makeyourdate.org/facts/> accessed Jan 29 2018.
3. Sun XL, Luo XP, Zhao CM, et al. The association between fine particulate matter exposure during pregnancy and preterm birth: a meta-analysis. *BMC Pregnancy Childbirth* 2015;15:12. doi: 10.1186/s12884-015-0738-2
4. Le HQ, Batterman SA, Wirth JJ, et al. Air pollutant exposure and preterm and term small-for-gestational-age births in Detroit, Michigan: Long-term trends and associations. *Environment International* 2012;44:7-17. doi: <http://dx.doi.org/10.1016/j.envint.2012.01.003>
5. Carolan-Olah M, Frankowska D. High environmental temperature and preterm birth: a review of the evidence. *Midwifery* 2014;30(1):50-9. doi: 10.1016/j.midw.2013.01.011 [published Online First: 2013/03/12]
6. Strand LB, Barnett AG, Tong S. The influence of season and ambient temperature on birth outcomes: a review of the epidemiological literature. *Environ Res* 2011;111(3):451-62. doi: 10.1016/j.envres.2011.01.023 [published Online First: 2011/02/22]
7. McMorris T, Swain J, Smith M, et al. Heat stress, plasma concentrations of adrenaline, noradrenaline, 5-hydroxytryptamine and cortisol, mood state and cognitive performance. *International Journal of Psychophysiology* 2006;61(2):204-15. doi: <https://doi.org/10.1016/j.ijpsycho.2005.10.002>
8. Dadvand P, Basagana X, Sartini C, et al. Climate extremes and the length of gestation. *Environ Health Perspect* 2011;119(10):1449-53. doi: 10.1289/ehp.1003241 [published Online First: 2011/06/11]
9. Strand LB, Barnett AG, Tong S. Maternal exposure to ambient temperature and the risks of preterm birth and stillbirth in Brisbane, Australia. *Am J Epidemiol* 2012;175(2):99-107. doi: 10.1093/aje/kwr404 [published Online First: 2011/12/15]
10. Guo TJ, Wang YY, Zhang HG, et al. The association between ambient temperature and the risk of preterm birth in China. *Sci Total Environ* 2018;613:439-46. doi: 10.1016/j.scitotenv.2017.09.104
11. Mathew S, Mathur D, Chang AB, et al. Examining the Effects of Ambient Temperature on Pre-Term Birth in Central Australia. *International Journal of Environmental Research and Public Health* 2017;14(2) doi: 10.3390/ijerph14020147
12. Ha SD, Liu DP, Zhu YY, et al. Ambient Temperature and Early Delivery of Singleton Pregnancies. *Environmental Health Perspectives* 2017;125(3):453-59. doi: 10.1289/ehp97
13. Basu R, Chen H, Li DK, et al. The impact of maternal factors on the association between temperature and preterm delivery. *Environmental Research* 2017;154:109-14. doi: 10.1016/j.envres.2016.12.017
14. Schifano P, Asta F, Dadvand P, et al. Heat and air pollution exposure as triggers of delivery: A survival analysis of population-based pregnancy cohorts in Rome and Barcelona. *Environment International* 2016;88:153-59. doi: 10.1016/j.envint.2015.12.013

15. He JR, Liu Y, Xia XY, et al. Ambient Temperature and the Risk of Preterm Birth in Guangzhou, China (2001-2011). *Environ Health Perspect* 2015 doi: 10.1289/ehp.1509778 [published Online First: 2015/12/17]
16. Arroyo V, Diaz J, Ortiz C, et al. Short term effect of air pollution, noise and heat waves on preterm births in Madrid (Spain). *Environmental Research* 2016;145:162-68. doi: 10.1016/j.envres.2015.11.034
17. Zheng XR, Zhang WS, Lu C, et al. An epidemiological assessment of the effect of ambient temperature on the incidence of preterm births: Identifying windows of susceptibility during pregnancy. *Journal of Thermal Biology* 2018;74:201-07. doi: 10.1016/j.jtherbio.2018.04.001
18. Zhong Q, Lu C, Zhang WS, et al. Preterm birth and ambient temperature: Strong association during night-time and warm seasons. *Journal of Thermal Biology* 2018;78:381-90. doi: 10.1016/j.jtherbio.2018.11.002
19. Lee SJ, Hajat S, Steer PJ, et al. A time-series analysis of any short-term effects of meteorological and air pollution factors on preterm births in London, UK. *Environ Res* 2008;106(2):185-94. doi: 10.1016/j.envres.2007.10.003 [published Online First: 2007/11/21]
20. Wolf J, Armstrong B. The association of season and temperature with adverse pregnancy outcome in two German states, a time-series analysis. *PLoS One* 2012;7(7):e40228. doi: 10.1371/journal.pone.0040228 [published Online First: 2012/07/14]
21. Porter KR, Thomas SD, Whitman S. The relation of gestation length to short-term heat stress. *American Journal of Public Health* 1999;89(7):1090-92. doi: 10.2105/ajph.89.7.1090
22. Buckley JP, Samet JM, Richardson DB. Commentary: Does air pollution confound studies of temperature? *Epidemiology* 2014;25(2):242-5. doi: 10.1097/ede.0000000000000051 [published Online First: 2014/02/04]
23. Yu X, Feric Z, Cordero JF, et al. Potential influence of temperature and precipitation on preterm birth rate in Puerto Rico. *Scientific reports* 2018;8:9. doi: 10.1038/s41598-018-34179-z
24. Dovnik A, Mujezinović F. The Association of Vitamin D Levels with Common Pregnancy Complications. *Nutrients* 2018;10(7):867. doi: 10.3390/nu10070867
25. Abel D, Holloway T, Kladar RM, et al. Response of Power Plant Emissions to Ambient Temperature in the Eastern United States. *Environ Sci Technol* 2017;51(10):5838-46. doi: 10.1021/acs.est.6b06201
26. Environmental Protection Agency (EPA). Ozone Pollution and Your Patient's Health: What is Ozone? 2018 [Available from: <https://www.epa.gov/ozone-pollution-and-your-patients-health/what-ozone> accessed December 20 2018.
27. National Climatic Data Center. Integrated Surface Database Lite 2010 [Available from: <http://www.ncdc.noaa.gov/oa/climate/isd/index.php> accessed July 2010.
28. Kalkstein LS, Valimont, K.M. An evaluation of summer discomfort in the United States using a relative climatological index. *Bull Am Meteorol Soc* 1986;7:842-48.
29. Oswald EM, Rood RB, Zhang K, et al. An investigation into the spatial variability of near-surface air temperatures in the Detroit, MI metropolitan region. *J Appl Meteorol Climatol* 2012;51(7):1290-304. doi: 10.1175/JAMC-D-11-0127.1
30. National Solar Radiation Database, 1991-2010 Update [Available from: [https://rredc.nrel.gov/solar/old\\_data/nsrdb/](https://rredc.nrel.gov/solar/old_data/nsrdb/) accessed August 25 2017.

- 1
  - 2
  - 3
  - 4
  - 5
  - 6
  - 7
  - 8
  - 9
  - 10
  - 11
  - 12
  - 13
  - 14
  - 15
  - 16
  - 17
  - 18
  - 19
  - 20
  - 21
  - 22
  - 23
  - 24
  - 25
  - 26
  - 27
  - 28
  - 29
  - 30
  - 31
  - 32
  - 33
  - 34
  - 35
  - 36
  - 37
  - 38
  - 39
  - 40
  - 41
  - 42
  - 43
  - 44
  - 45
  - 46
  - 47
  - 48
  - 49
  - 50
  - 51
  - 52
  - 53
  - 54
  - 55
  - 56
  - 57
  - 58
  - 59
  - 60
31. Wilcox S. National Solar Radiation Database 1991-2010 Update: User's Manual. In: National Renewable Energy Laboratory, ed.: U.S. Department of Energy, Office of Energy Efficiency & Renewable Energy, 2012.
32. PRISM Climate Group. PRISM Climate Data 2019 [Available from: <http://www.prism.oregonstate.edu/> accessed March 6 2016.
33. U.S. Environmental Protection Agency. AirData 2015 [Available from: [http://aqsdrl.epa.gov/aqsweb/aqstmp/airdata/download\\_files.html](http://aqsdrl.epa.gov/aqsweb/aqstmp/airdata/download_files.html) accessed Feb 5 2015.
34. Avalos LA, Chen H, Li DK, et al. The impact of high apparent temperature on spontaneous preterm delivery: a case-crossover study. *Environmental Health* 2017;16 doi: 10.1186/s12940-017-0209-5
35. Nguyen QC, Osypuk TL, Schmidt NM, et al. Practical Guidance for Conducting Mediation Analysis With Multiple Mediators Using Inverse Odds Ratio Weighting. *American Journal of Epidemiology* 2015;181(5):349-56. doi: 10.1093/aje/kwu278
36. Nie L, Chu H, Li F, et al. Relative Excess Risk Due to Interaction: Resampling-based Confidence Intervals. *Epidemiology* 2010;21(4):552-56.
37. Gasparrini A, Armstrong B, Kenward MG. Distributed lag non-linear models. *Stat Med* 2010;29(21):2224-34. doi: 10.1002/sim.3940 [doi] [published Online First: 2010/09/03]
38. Venables WN, Ripley BD. Functions and Datasets to Support "Modern Applied Statistics with S" (4th edition, 2002) 2018 [Available from: <https://cran.r-project.org/web/packages/MASS/index.html> accessed April 1 2019.
39. Kent ST, McClure LA, Zaitchik BF, et al. Heat Waves and Health Outcomes in Alabama (USA): The Importance of Heat Wave Definition. *Environ Health Perspect* 2013 doi: 10.1289/ehp.1307262 [published Online First: 2013/11/26]
40. Schifano P, Lallo A, Asta F, et al. Effect of ambient temperature and air pollutants on the risk of preterm birth, Rome 2001-2010. *Environ Int* 2013;61:77-87. doi: 10.1016/j.envint.2013.09.005 [published Online First: 2013/10/10]
41. Sun SZ, Weinberger KR, Spangler KR, et al. Ambient temperature and preterm birth: A retrospective study of 32 million US singleton births. *Environment International* 2019;126:7-13. doi: 10.1016/j.envint.2019.02.023
42. Behrman RE, Adashi EY, Allen MC, et al. Preterm Birth: Causes, Consequences, and Prevention. In: Medicine Io, ed. Report Brief. Washington, DC: Institute of Medicine, 2006.
43. Stan C, Boulvain M, Hirsbrunner-Amagbaly P, et al. Hydration for treatment of preterm labour. *Cochrane Database Syst Rev* 2002;2
44. United States. Bureau of the Census. American Housing Survey, 1993: MSA Core and Supplement File: [distributor], 2006.
45. Peel MC, Finlayson BL, McMahon TA. Updated world map of the Köppen-Geiger climate classification. *Hydrol Earth Syst Sci* 2007;11(5):1633-44. doi: 10.5194/hess-11-1633-2007
46. Giorgis-Allemand L, Pedersen M, Bernard C, et al. The Influence of Meteorological Factors and Atmospheric Pollutants on the Risk of Preterm Birth. *American Journal of Epidemiology* 2017;185(4):247-58. doi: 10.1093/aje/kww141
47. Lin YF, Hu WJ, Xu J, et al. Association between temperature and maternal stress during pregnancy. *Environmental Research* 2017;158:421-30. doi: 10.1016/j.envres.2017.06.034

- 1  
2  
3 48. Stieb DM, Lavigne E, Chen L, et al. Air pollution in the week prior to delivery and preterm  
4 birth in 24 Canadian cities: a time to event analysis. *Environ Health* 2019;18(1):1. doi:  
5 10.1186/s12940-018-0440-8 [published Online First: 2019/01/05]  
6  
7 49. Vicedo-Cabrera AM, Iniguez C, Barona C, et al. Exposure to elevated temperatures and risk  
8 of preterm birth in Valencia, Spain. *Environmental Research* 2014;134:210-17. doi:  
9 10.1016/j.envres.2014.07.021  
10  
11 50. Wingate MS, Alexander GR, Buekens P, et al. Comparison of Gestational Age  
12 Classifications: Date of Last Menstrual Period vs. Clinical Estimate. *Annals of*  
13 *epidemiology* 2007;17(6):425-30. doi: <https://doi.org/10.1016/j.annepidem.2007.01.035>  
14  
15  
16  
17  
18  
19  
20  
21  
22  
23  
24  
25  
26  
27  
28  
29  
30  
31  
32  
33  
34  
35  
36  
37  
38  
39  
40  
41  
42  
43  
44  
45  
46  
47  
48  
49  
50  
51  
52  
53  
54  
55  
56  
57

## TABLES

Table 1. Demographics of Preterm Births in Detroit, MI Study Area, May-September, 1991-2001.

|                               | N     | %    |
|-------------------------------|-------|------|
| Total                         | 9,053 | 100  |
| Month                         |       |      |
| May                           | 1,918 | 21.2 |
| June                          | 1,944 | 21.5 |
| July                          | 1,903 | 21.0 |
| August                        | 1,754 | 19.4 |
| September                     | 1,534 | 16.9 |
| Year (Two Equal Time Periods) |       |      |
| 1991-1995                     | 4,708 | 56.2 |
| 1996-2000                     | 3,670 | 43.8 |
| Maternal Race                 |       |      |
| White                         | 2,443 | 27.0 |
| Black                         | 6,433 | 71.1 |
| Other                         | 177   | 1.9  |
| Maternal Smoking Status       |       |      |
| Non-Smoker                    | 6,621 | 73.1 |
| Smoker                        | 2,345 | 25.9 |
| Missing                       | 87    | 1.0  |
| Level of Prenatal Care        |       |      |
| Prenatal Care                 | 5,037 | 55.6 |
| Late or No Prenatal Care      | 2,960 | 32.7 |
| Missing                       | 1,056 | 11.7 |
| Maternal Age                  |       |      |
| 16-19 years                   | 1,782 | 19.7 |
| 20-29 years                   | 4,821 | 53.2 |
| ≥ 30 years                    | 2,450 | 27.1 |
| Maternal Education            |       |      |
| Less than High School         | 3,485 | 38.5 |
| High School or Higher         | 5,451 | 60.2 |
| Missing                       | 117   | 1.3  |



Table 2. Daily Exposures Among the PTB Cases, Detroit, MI Area, May-September, 1991-2001.

|                                                                          | N     | Median | Mean  | Min  | Max   |
|--------------------------------------------------------------------------|-------|--------|-------|------|-------|
| Two-day mean apparent temperature, °C                                    | 9,053 | 18.6   | 18.0  | 3.1  | 28.0  |
| Two-day mean apparent temperature 18.6 °C and above                      | 9,053 | 0.1    | 1.5   | 0.0  | 9.4   |
| Mean solar radiation (W/m <sup>2</sup> )                                 | 9,053 | 226.4  | 217.7 | 38.1 | 352.8 |
| Total precipitation (mm) <sup>a</sup>                                    | 9,053 | 0.0    | 0.4   | 0.0  | 56.7  |
| Mean wind speed (m/s)                                                    | 9,053 | 3.6    | 3.6   | 0.1  | 8.0   |
| Maximum 8-hour average ozone (ppb)                                       | 9,039 | 43.0   | 44.8  | 3.2  | 102.0 |
| Mean particulate matter, 10 µm or less (µg/m <sup>3</sup> ) <sup>a</sup> | 8,331 | 39.0   | 38.5  | 8.0  | 158.0 |
| Mean nitrogen dioxide (ppb) <sup>a</sup>                                 | 8,956 | 18.4   | 19.7  | 0.0  | 72.8  |

<sup>a</sup> Geometric means are provided. Values were natural-log-transformed in the regression analyses.

Table 3. Relative Risk of Preterm Birth and Percent of Preterm Births Attributable to 2-day Mean Apparent Temperature (AT) on a 24.9 °C Day vs. an 18.6 °C Day, Detroit, MI Area, May-September, 1991-2001.

| Model | Knots in day-of-year spline | Covariates                                                                    | Relative Risk (95% Confidence Interval) | Percent attributable (95% Confidence Interval) |
|-------|-----------------------------|-------------------------------------------------------------------------------|-----------------------------------------|------------------------------------------------|
| 1     | 2                           | none                                                                          | 1.11 (1.02, 1.09)                       | 9.9 (2.4, 16.4)                                |
| 2     | 5                           | none                                                                          | 1.11 (1.03, 1.20)                       | 9.8 (2.6, 16.5)                                |
| 3     | 8                           | none                                                                          | 1.09 (1.01, 1.18)                       | 8.1 (1.0, 17.6)                                |
| 4     | 5                           | solar radiation, wind speed, precipitation                                    | 1.12 (1.04, 1.21)                       | 10.6 (3.8, 17.2)                               |
| 5     | 5                           | solar radiation, wind speed, precipitation, inverse-odds weights <sup>s</sup> | 1.12 (1.02, 1.21)                       | 10.4 (2.2, 17.5)                               |

<sup>s</sup>Inverse-odds weights calculated from the predicted odds of AT given lag day 0 and 1 of ozone, PM<sub>10</sub> and NO<sub>2</sub>.

Table 4. Relative Excess Risk Due to Interaction (RERI) for Interactions of 2-Day Mean Apparent Temperature (AT) on a 24.9 °C Day vs. an 18.6 °C Day with Maternal Characteristics, Detroit, MI Area, May-September, 1991-2001.

| Characteristic    | RERI | 95% Confidence Interval |
|-------------------|------|-------------------------|
| Black race        | -1.5 | -1.9, -1.0              |
| Age 16-19 years   | 0.50 | 0.22, 0.76              |
| Age > 30 years    | 0.34 | 0.08, 0.65              |
| Low prenatal care | 0.44 | 0.19, 0.65              |
| No high school    | 0.19 | -0.06, 0.43             |
| Smoker            | 0.52 | 0.29, 0.76              |

1. With 5 knots in the day-of-year spline.

1  
2  
3  
4  
5  
6  
7  
8  
9  
10  
11  
12  
13  
14  
15  
16  
17  
18  
19  
20  
21  
22  
23  
24  
25  
26  
27  
28  
29  
30  
31  
32  
33  
34  
35  
36  
37  
38  
39  
40  
41  
42  
43  
44  
45  
46  
47  
48  
49  
50  
51  
52  
53  
54  
55  
56  
57  
58  
59  
60

## FIGURE LEGENDS

Figure 1. Directed Acyclic Graph of the Causal Framework for Mediation of the Association Between Apparent Temperature (AT) and Preterm Birth (PTB) by Air Pollutants.

Figure 2. Association Between Mean Apparent Temperature (AT) Over Lag Days 0-1 and Preterm Birth (PTB), modeling AT as a b-spline with 3 df.

For peer review only



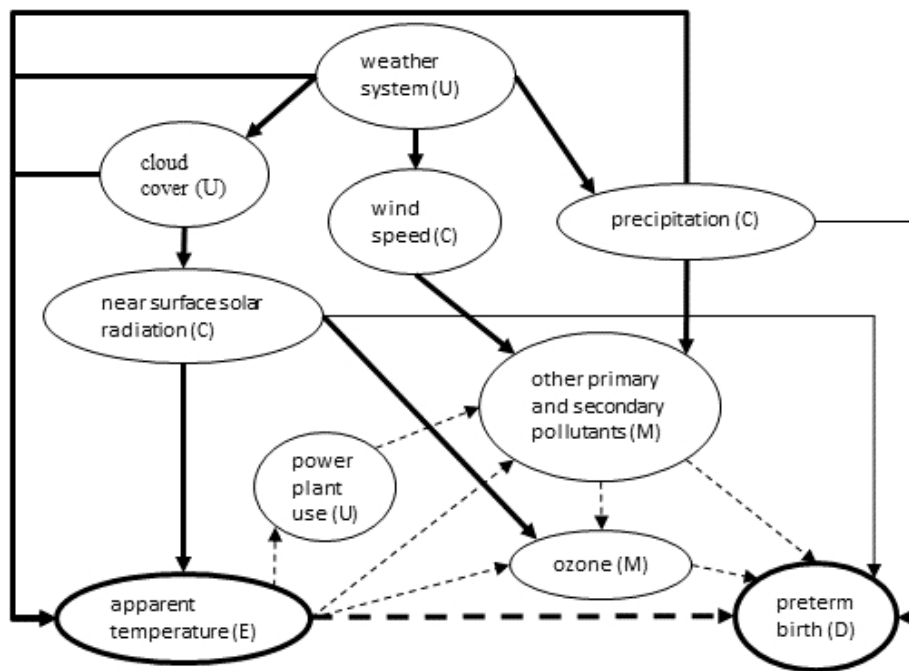

Figure 1. Directed Acyclic Graph of the Causal Framework for Mediation of the Association Between Apparent Temperature (AT) and Preterm Birth (PTB) by Air Pollutants.

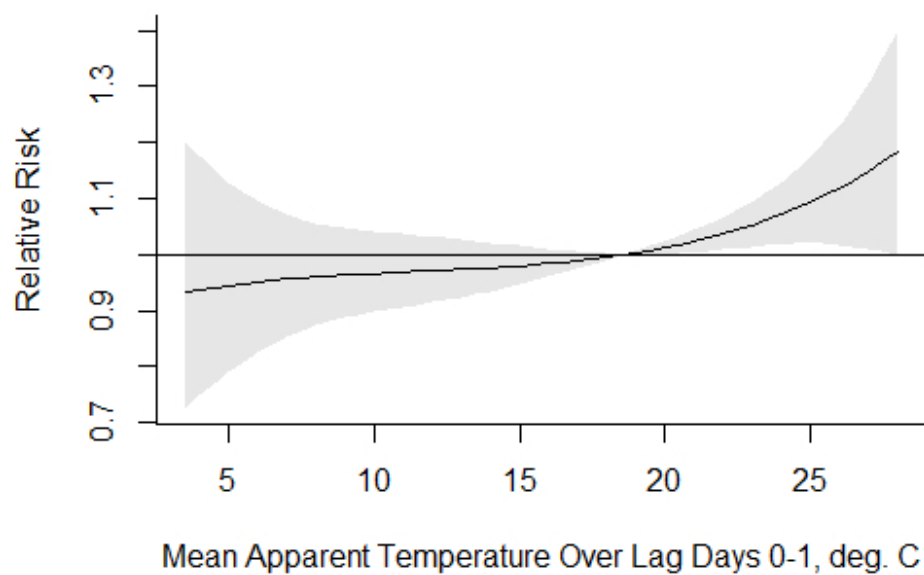

Figure 2. Association Between Mean Apparent Temperature (AT) Over Lag Days 0-1 and Preterm Birth (PTB), modeling AT as a b-spline with 3 df.

1  
2  
3 **SUPPLEMENTAL MATERIAL**  
4

5 Table S1. Percent of preterm births attributable to 2-day mean apparent temperature (AT) on a 24.9 °C  
6 day vs. an 18.6 °C day, Detroit, MI, May-September, 1991-2001, using a case-crossover design.

7  
8  
9  
10  
11  
12  
13  
14  
15  
16

| Model | Time stratum | Covariates                                                                    | Percent attributable | 95% Confidence Interval |
|-------|--------------|-------------------------------------------------------------------------------|----------------------|-------------------------|
| 1     | 3 weeks      | none                                                                          | 11.2                 | 6.1, 15.9               |
| 2     | 2 weeks      | none                                                                          | 11.7                 | 6.9, 16.3               |
| 3     | 1 month      | none                                                                          | 11.7                 | 6.8, 16.4               |
| 4     | 3 weeks      | solar radiation, wind speed, precipitation                                    | 18.7                 | 1.3, 31.5               |
| 5     | 3 weeks      | solar radiation, wind speed, precipitation, inverse-odds weights <sup>s</sup> | 11.1                 | 3.5, 17.5               |

17 <sup>s</sup>Inverse-odds weights calculated from the predicted odds of AT given lag day 0 and 1 of ozone, PM<sub>10</sub> and  
18 NO<sub>2</sub>.  
19  
20  
21  
22  
23  
24  
25  
26  
27  
28  
29  
30  
31  
32  
33  
34  
35  
36  
37  
38  
39  
40  
41  
42  
43  
44  
45  
46  
47  
48  
49  
50  
51  
52  
53  
54  
55  
56  
57  
58  
59  
60

**STROBE 2007 (v4) checklist of items to be included in reports of observational studies in epidemiology\***  
**Checklist for cohort, case-control, and cross-sectional studies (combined)**

| Section/Topic             | Item # | Recommendation                                                                                                                                                                                                                                                                                                                                                                                                                                                         | Reported on page # |
|---------------------------|--------|------------------------------------------------------------------------------------------------------------------------------------------------------------------------------------------------------------------------------------------------------------------------------------------------------------------------------------------------------------------------------------------------------------------------------------------------------------------------|--------------------|
| Title and abstract        | 1      | (a) Indicate the study's design with a commonly used term in the title or the abstract                                                                                                                                                                                                                                                                                                                                                                                 | 1                  |
|                           |        | (b) Provide in the abstract an informative and balanced summary of what was done and what was found                                                                                                                                                                                                                                                                                                                                                                    | 2                  |
| <b>Introduction</b>       |        |                                                                                                                                                                                                                                                                                                                                                                                                                                                                        |                    |
| Background/rationale      | 2      | Explain the scientific background and rationale for the investigation being reported                                                                                                                                                                                                                                                                                                                                                                                   | 4-5                |
| Objectives                | 3      | State specific objectives, including any pre-specified hypotheses                                                                                                                                                                                                                                                                                                                                                                                                      | 5                  |
| <b>Methods</b>            |        |                                                                                                                                                                                                                                                                                                                                                                                                                                                                        |                    |
| Study design              | 4      | Present key elements of study design early in the paper                                                                                                                                                                                                                                                                                                                                                                                                                | 5                  |
| Setting                   | 5      | Describe the setting, locations, and relevant dates, including periods of recruitment, exposure, follow-up, and data collection                                                                                                                                                                                                                                                                                                                                        | 5-8                |
| Participants              | 6      | (a) <i>Cohort study</i> —Give the eligibility criteria, and the sources and methods of selection of participants. Describe methods of follow-up<br><i>Case-control study</i> —Give the eligibility criteria, and the sources and methods of case ascertainment and control selection. Give the rationale for the choice of cases and controls<br><i>Cross-sectional study</i> —Give the eligibility criteria, and the sources and methods of selection of participants | 5-6                |
|                           |        | (b) <i>Cohort study</i> —For matched studies, give matching criteria and number of exposed and unexposed<br><i>Case-control study</i> —For matched studies, give matching criteria and the number of controls per case                                                                                                                                                                                                                                                 | 5-6, Table 1       |
| Variables                 | 7      | Clearly define all outcomes, exposures, predictors, potential confounders, and effect modifiers. Give diagnostic criteria, if applicable                                                                                                                                                                                                                                                                                                                               | 5-8, Tables 1-2    |
| Data sources/ measurement | 8*     | For each variable of interest, give sources of data and details of methods of assessment (measurement). Describe comparability of assessment methods if there is more than one group                                                                                                                                                                                                                                                                                   | 5-8, Tables 1-2    |
| Bias                      | 9      | Describe any efforts to address potential sources of bias                                                                                                                                                                                                                                                                                                                                                                                                              | 5-8                |
| Study size                | 10     | Explain how the study size was arrived at                                                                                                                                                                                                                                                                                                                                                                                                                              | 5                  |
| Quantitative variables    | 11     | Explain how quantitative variables were handled in the analyses. If applicable, describe which groupings were chosen and why                                                                                                                                                                                                                                                                                                                                           | 5-8                |
| Statistical methods       | 12     | (a) Describe all statistical methods, including those used to control for confounding                                                                                                                                                                                                                                                                                                                                                                                  | 8-11               |
|                           |        | (b) Describe any methods used to examine subgroups and interactions                                                                                                                                                                                                                                                                                                                                                                                                    | 10                 |
|                           |        | (c) Explain how missing data were addressed                                                                                                                                                                                                                                                                                                                                                                                                                            | 9                  |
|                           |        | (d) <i>Cohort study</i> —If applicable, explain how loss to follow-up was addressed<br><i>Case-control study</i> —If applicable, explain how matching of cases and controls was addressed                                                                                                                                                                                                                                                                              | 8-9                |

|                          |     |                                                                                                                                                                                                              |                     |
|--------------------------|-----|--------------------------------------------------------------------------------------------------------------------------------------------------------------------------------------------------------------|---------------------|
|                          |     | <i>Cross-sectional study</i> —If applicable, describe analytical methods taking account of sampling strategy                                                                                                 |                     |
|                          |     | (e) Describe any sensitivity analyses                                                                                                                                                                        | 9                   |
| <b>Results</b>           |     |                                                                                                                                                                                                              |                     |
| Participants             | 13* | (a) Report numbers of individuals at each stage of study—eg numbers potentially eligible, examined for eligibility, confirmed eligible, included in the study, completing follow-up, and analysed            | Table 1             |
|                          |     | (b) Give reasons for non-participation at each stage                                                                                                                                                         | NA                  |
|                          |     | (c) Consider use of a flow diagram                                                                                                                                                                           | NA                  |
| Descriptive data         | 14* | (a) Give characteristics of study participants (eg demographic, clinical, social) and information on exposures and potential confounders                                                                     | Tables 1-2 and text |
|                          |     | (b) Indicate number of participants with missing data for each variable of interest                                                                                                                          | Table 1             |
|                          |     | (c) <i>Cohort study</i> —Summarise follow-up time (eg, average and total amount)                                                                                                                             | NA                  |
| Outcome data             | 15* | <i>Cohort study</i> —Report numbers of outcome events or summary measures over time                                                                                                                          | NA                  |
|                          |     | <i>Case-control study</i> —Report numbers in each exposure category, or summary measures of exposure                                                                                                         | Table 2 and text    |
|                          |     | <i>Cross-sectional study</i> —Report numbers of outcome events or summary measures                                                                                                                           | NA                  |
| Main results             | 16  | (a) Give unadjusted estimates and, if applicable, confounder-adjusted estimates and their precision (eg, 95% confidence interval). Make clear which confounders were adjusted for and why they were included | Table 3 and text    |
|                          |     | (b) Report category boundaries when continuous variables were categorized                                                                                                                                    | Table 1             |
|                          |     | (c) If relevant, consider translating estimates of relative risk into absolute risk for a meaningful time period                                                                                             | Table 3 and text    |
| Other analyses           | 17  | Report other analyses done—eg analyses of subgroups and interactions, and sensitivity analyses                                                                                                               | Tables 3-4 and text |
| <b>Discussion</b>        |     |                                                                                                                                                                                                              |                     |
| Key results              | 18  | Summarise key results with reference to study objectives                                                                                                                                                     | 13                  |
| Limitations              | 19  | Discuss limitations of the study, taking into account sources of potential bias or imprecision. Discuss both direction and magnitude of any potential bias                                                   | 14-16               |
| Interpretation           | 20  | Give a cautious overall interpretation of results considering objectives, limitations, multiplicity of analyses, results from similar studies, and other relevant evidence                                   | 13, 18              |
| Generalisability         | 21  | Discuss the generalisability (external validity) of the study results                                                                                                                                        | 13-15, 18           |
| <b>Other information</b> |     |                                                                                                                                                                                                              |                     |
| Funding                  | 22  | Give the source of funding and the role of the funders for the present study and, if applicable, for the original study on which the present article is based                                                | 18                  |

\*Give information separately for cases and controls in case-control studies and, if applicable, for exposed and unexposed groups in cohort and cross-sectional studies.

**Note:** An Explanation and Elaboration article discusses each checklist item and gives methodological background and published examples of transparent reporting. The STROBE checklist is best used in conjunction with this article (freely available on the Web sites of PLoS Medicine at <http://www.plosmedicine.org/>, Annals of Internal Medicine at <http://www.annals.org/>, and Epidemiology at <http://www.epidem.com/>). Information on the STROBE Initiative is available at [www.strobe-statement.org](http://www.strobe-statement.org).
