# Supplementary material for: Time series analysis of total and direct associations between high temperatures and preterm births in Detroit, Michigan
Source: PubMed Central journal article supplement (PMC7045030; doi:10.1136/bmjopen-2019-032476), 2020-02-05
Supplement: bmjopen-2019-032476supp001.pdf [file bmjopen-2019-032476supp001.pdf]

**SUPPLEMENTAL MATERIAL**

Table S1. Percent of preterm births attributable to 2-day mean apparent temperature (AT) on a 24.9 °C day vs. an 18.6 °C day, Detroit, MI, May-September, 1991-2001, using a case-crossover design.

| Model | Time stratum | Covariates                                                                    | Percent attributable | 95% Confidence Interval |
|-------|--------------|-------------------------------------------------------------------------------|----------------------|-------------------------|
| 1     | 3 weeks      | none                                                                          | 11.2                 | 6.1, 15.9               |
| 2     | 2 weeks      | none                                                                          | 11.7                 | 6.9, 16.3               |
| 3     | 1 month      | none                                                                          | 11.7                 | 6.8, 16.4               |
| 4     | 3 weeks      | solar radiation, wind speed, precipitation                                    | 18.7                 | 1.3, 31.5               |
| 5     | 3 weeks      | solar radiation, wind speed, precipitation, inverse-odds weights <sup>s</sup> | 11.1                 | 3.5, 17.5               |

<sup>s</sup>Inverse-odds weights calculated from the predicted odds of AT given lag day 0 and 1 of ozone, PM<sub>10</sub> and NO<sub>2</sub>.
